1 Haploid androgenetic development in bovines reveals imbalanced WNT signaling  
2 and impaired cell fate differentiation.

3  
4 <sup>1,2</sup>Luis M. Aguila, <sup>1,3</sup>Ricardo P. Nociti, <sup>1</sup>Rafael V. Sampaio, <sup>1</sup>Jacinthe Therrien, <sup>3</sup>Flavio V.  
5 Meirelles, <sup>2</sup>Ricardo N. Felmer, <sup>1</sup>Lawrence C. Smith.

6  
7 <sup>1</sup>Centre de Recherche en Reproduction et Fertilité (CRRF), Université de Montréal, St-Hyacinthe,  
8 QC J2S 2M2, Canada.

9  
10 <sup>2</sup>Laboratory of Reproduction, Centre of Reproductive Biotechnology (CEBIOR-BIOREN),  
11 Faculty of Agriculture and Forestry, Universidad de La Frontera, Temuco, Chile.

12  
13 <sup>3</sup>Department of Veterinary Medicine, Faculty of Animal Sciences and Food Engineering,  
14 University of Sao Paulo, Pirassununga, São Paulo, Brazil.

15  
16 \* **Correspondence:**  
17 [lawrence.c.smith@umontreal.ca](mailto:lawrence.c.smith@umontreal.ca)

18 **Keywords:** uniparental embryos, imprinted genes, blastocyst

19  
20 **Summary statement**

21 This study shows the importance of the WNT pathway on bovine haploid androgenetic  
22 development by walking through transcriptomics and pluripotency markers associated with cell  
23 fate determination during early development.

24  
25 **Abstract**

26  
27 Haploid embryos have contributed significantly to our understanding of the role of parental  
28 genomes in development and can be applied to important biotechnology for human and animal  
29 species. However, development to the blastocyst stage is severely hindered in bovine haploid  
30 androgenetic embryos (hAE). To further our understanding of such developmental arrest, we  
31 performed a comprehensive comparison of the transcriptomic profile of morula-stage embryos,  
32 which were validated by qRT-PCR of transcripts associated with differentiation in haploid and  
33 biparental embryos. Among numerous disturbances, results showed that pluripotency pathways,  
34 especially the wingless-related integration site (WNT) signaling, were particularly unbalanced in  
35 hAE. Moreover, transcript levels of *KLF4*, *NANOG*, *POU5F1*, *SOX2*, *CDX2*, *CTNNB1*, *AXIN2*,  
36 and *GSK3B* were noticeably altered in hAE, suggesting disturbance of pluripotency and canonical  
37 WNT pathway. To evaluate the role of WNT on hAE competence, we exposed early day-5 morula

38 stage embryos to the *GSK3B* inhibitor CHIR99021. Although no alterations were observed in  
39 pluripotency and WNT-related transcripts, exposure to CHIR99021 improved their ability to reach  
40 the blastocysts stage, confirming the importance of the WNT pathway in the developmental  
41 features of bovine hAE.

42

## 43 **Introduction**

44

45 Landmark experiments that occurred independently by two groups close to four decades  
46 ago lay the ground for our current understanding of the essential and complementary contributions  
47 of the maternal and paternal genome in mammalian development (Barton et al., 1984; McGrath &  
48 Solter, 1984; Surani et al., 1984). These reports showed that while embryos derived from zygotes  
49 with two male pronuclei (diploid androgenotes) cannot develop normally, their trophoblast  
50 develops well. Conversely, zygotes with two female pronuclei (diploid parthenotes) can develop  
51 rather normal embryos with very poor extraembryonic tissue, indicating that the paternal genome  
52 is essential for the development of extraembryonic tissue and the maternal genome is particularly  
53 important for the development of the embryo itself. These functional differences in developmental  
54 genes between parental genomes founded the epigenetic mechanism of genomic imprinting.

55 Although recent studies indicated that genetic and epigenetic alterations to specific regions  
56 controlling the expression of a few key imprinted genes are sufficient to overcome such barriers  
57 to allow complete development to term of both bimaternal and bipaternal mice (Kawahara et al.,  
58 2007; Kono et al., 2004; Z. Li et al., 2016; Z.-K. Li et al., 2018; Ogawa et al., 2006; Wei et al.,  
59 2022), murine genetically unaltered parthenogenetic and androgenetic embryos die by day 10 and  
60 6.5 of gestation, respectively (Barton et al., 1984; Latham et al., 2002; Surani et al., 1984, 1986).  
61 Moreover, it is known that already at the preimplantation stages of development, uniparental  
62 embryos are affected with regard to cell numbers, morphology and expression profile in laboratory  
63 and domestic species models (Aguila et al., 2021; Cui et al., 2011; Gomez et al., 2009; Kure-  
64 bayashi et al., 2000; Lagutina et al., 2004; Latham et al., 1994; Loi et al., 1998; Ozil & Huneau,  
65 2001; Thomson & Solter, 1988; Z. Wang et al., 2008). In cattle, reports have described particularly  
66 poor development of androgenetic embryos, indicating that a more thorough investigation of the  
67 molecular mechanisms controlling the development of androgenetic embryos is required in this  
68 species (Aguila et al., 2021; Lagutina et al., 2004; Vichera et al., 2011; S. Wang et al., 2017; H.

69 Zhang et al., 2014). Importantly, uniparental haploid embryos are very efficient models for genome  
70 imprinting research and allow studies on the contribution of the paternal and maternal genome to  
71 early embryonic development. Moreover, haploid embryos have been used to derive embryonic  
72 stem cells and hold great promise for functional genetic studies and animal biotechnology (Bai et  
73 al., 2016, 2019; Kokubu & Takeda, 2014; L. Wang & Li, 2019).

74 Wntless-related integration site (WNT) signaling is a well-known evolutionary and  
75 conserved pathway that regulates crucial aspects of cell fate determination and embryonic  
76 development (Krivega et al., 2015). In cattle, there are several studies reporting effects of the  
77 activation of WNT signaling during the early period of embryonic development (Aparicio et al.,  
78 2010; Denicol et al., 2013). For instance, a recent report observed that activation of WNT signaling  
79 by the small molecule CHIR99021 increased the levels of *NANOG* and *OCT4* transcripts and  
80 *NANOG* positive cells within the inner-cell-mass (ICM), indicating that WNT activation leads to  
81 the formation of the ICM and may significantly impact the pluripotency profile and quality of the  
82 resulting blastocysts (Warzych et al., 2020).

83 Thus, the present study aimed to profile global transcriptomic of bovine haploid embryos  
84 and investigate on pluripotency features and signalling pathways associated with early  
85 developmental failure. In addition, we examined the effect of activating the WNT pathway using  
86 the GSK3b inhibitor CHIR99021 and how it impacts on developmental competence of bovine  
87 haploid androgenetic embryos. Transcriptomic analysis points to a role of the WNT and  
88 pluripotency pathways leading to early differentiation anomalies that can be alleviated by exposure  
89 to CHIR99021. The potential significance of these findings is discussed.

90

## 91 **Material and method**

### 92 *Oocyte collection and in vitro maturation*

93 Bovine ovaries were obtained from a local slaughterhouse and transported to the laboratory  
94 in sterile 0.9% NaCl at 25–30°C in a thermos bottle. Cumulus–oocyte complexes (COCs) were  
95 aspirated from 5–10 mm antral follicles using a 12-gauge disposable needle. For in vitro maturation  
96 (IVM), COCs with several cumulus cell layers were selected, washed, and placed in a maturation  
97 medium composed of TCM199 (Invitrogen Life Technologies), 10% fetal bovine serum (FBS;  
98 Invitrogen Life Technologies), 0.2 mM pyruvate (Sigma-Aldrich), 50 mg/mL gentamicin (Sigma-  
99 Aldrich), 6 µg/mL luteinizing hormone (Sioux Biochemical), 6 µg/mL follicle-stimulating

100 hormone (Bioniche Life Science) and 1  $\mu\text{g}/\text{mL}$  estradiol (Sigma-Aldrich). In vitro oocyte  
101 maturation was performed for 22-24 h at 38.5°C in a humidified atmosphere at 5%  $\text{CO}_2$ .

102

103 *Sperm preparation.*

104 Straws of sex-sorted semen stored in liquid nitrogen were thawed for 1 min in a water bath  
105 at 35.8°C, added to a discontinuous silane-coated silica gradient (45 over 90% BoviPure, Nidacn  
106 Laboratories AB), and centrifuged at 600 X g for 5 min. The supernatant containing the  
107 cryoprotectant and dead spermatozoa was discarded, and the pellet with viable spermatozoa was  
108 re-suspended in 1 mL of modified Tyrode's lactate (TL) medium and centrifuged at 300 X g for 2  
109 min.

110

111 *Production of biparental embryos*

112 In vitro fertilization (IVF): After 20–24 h of IVM, COCs were washed twice in TL medium  
113 before being transferred in groups of 5–48  $\mu\text{L}$  droplets under mineral oil. The IVF droplets  
114 consisted of modified TL medium supplemented with fatty-acid-free BSA (0.6% w/v), pyruvic  
115 acid (0.2 mM), heparin (2  $\mu\text{g}/\text{mL}$ ), and gentamycin (50 mg/mL). COCs were transferred to IVF  
116 droplets 15 min prior to adding the spermatozoa. To stimulate sperm motility, penicillamine (2  
117 mM; Sigma-Aldrich), hypotaurine (1 mM; Sigma-Aldrich) and epinephrine (250 mM; Sigma-  
118 Aldrich) were added to each droplet. The selected spermatozoa were counted using a  
119 hemocytometer and diluted with IVF medium to obtain a final concentration of  $1 \times 10^6$  sperm/mL.  
120 Finally, 2  $\mu\text{L}$  of the sperm suspension was added to the droplets containing the matured COCs.  
121 The fertilization medium was incubated at 38.5°C for 18 h in a humidified atmosphere of 95% air  
122 and 5%  $\text{CO}_2$ . Presumptive zygotes were denuded by gentle pipetting.

123 Intracytoplasmic sperm injection (ICSI): ICSI was performed according to standard  
124 protocols (Horiuchi et al., 2002) on the stage of a Nikon Ti-S inverted microscope (Nikon Canada  
125 Inc.) fitted with Narishige micromanipulators (Narishige International) and a Piezo drill system  
126 (PMM 150HJ/FU; Prime tech Ltd.). Before ICSI, oocytes were denuded of granulosa cells by  
127 gently pipetting in the presence of 1 mg/mL hyaluronidase, selected for the presence of the first  
128 polar body and randomly allocated to experimental groups. After ICSI, oocytes were washed at



129 least three times and cultured in modified synthetic oviduct fluid (mSOF) media as previously  
130 described (Landry et al., 2016).

131

### 132 *Production of haploid embryos.*

133 Bovine haploid androgenetic embryos (hAE) were produced using female-sorted (X-  
134 chromosome carrying) as previously reported by our group (Aguila et al., 2021). Bovine haploid  
135 parthenogenetic embryos (hPE) were produced according to Valencia et al., (2021). Briefly,  
136 chemical oocyte activation was performed between 20 to 24 h after IVM by 5 min exposure to 5  
137  $\mu$ M ionomycin (Calbiochem). To obtain haploid parthenotes, ionomycin treatment was followed  
138 by incubation in 10 mg/mL cycloheximide (CHX; Sigma-Aldrich) for 5 h. After parthenogenetic  
139 activation, presumptive zygotes were washed and allocated to *in vitro* culture droplets.

140

### 141 *In vitro* culture

142 For *in vitro* culture, groups of 10 embryos were placed in droplets (10  $\mu$ l) of modified  
143 serum-free synthetic oviduct fluid (mSOF) with non-essential amino acids, 3 mM EDTA, and  
144 0.4% fatty-acid-free BSA (Sigma-Aldrich) under embryo-tested mineral oil. The embryo culture  
145 dishes were incubated at 38.5°C with 6.5% CO<sub>2</sub>, 5% O<sub>2</sub>, and 88.5% N<sub>2</sub> in 100% humidity. In some  
146 treatment groups, GSK3B-inhibition was induced from day 5 onward with 3  $\mu$ M of CHIR99021  
147 (TOCRIS) (Tribulo et al., 2017). Morulas cultured in 0.001% of DMSO were used as the vehicle  
148 control.

149

### 150 *RNA-seq Library preparation and RNA sequencing*

151 Day-6 morula stage embryos from the haploid androgenetic (hAE), parthenogenetic (hPE)  
152 and biparental (ICSI) groups were selected (five of each group) and individually analyzed. To  
153 obtain the cDNA samples for sequencing, embryos were transferred with the minimal solution  
154 possible (<1 $\mu$ L) to microtubes (free DNAase/RNAase) and snap-frozen individually in liquid  
155 nitrogen and stored at -80°C until RNA extraction. The SMART-Seq®HT kit (Takara Bio, USA),  
156 which uses a poly A tail filter to capture RNA, was used for RNA extraction, amplification, and  
157 cDNA production following the manufacturer's recommendation. RNA quantification was verified

158 by fluorometry (Qubit® ThermoFischer) and RNA quality control was verified using the Agilent  
159 Bioanalyzer system. RNA was amplified in 17 PCR cycles and selected for sequencing based on  
160 RNA concentration and integrity. Libraries were prepared using the NextEra XT Stranded mRNA  
161 Sample Prep kit and quantified by qPCR using the KAPA Library Quantification kit (Illumina;  
162 KAPA Biosystems).

163 Sequencing was performed on Illumina Nova seq (2x100bp) and reads quality was assessed  
164 using FASTQC software (<http://www.bioinformatics.babraham.ac.uk/projects/fastqc/>) (Andrews  
165 et al., 2018). The samples underwent quality filtering (average Phred score > 24 and read length  
166 >30) and adapter removal using cutadapt implemented in the Trimgalore pipeline (Martin, 2010).  
167 After the quality filter, sequencing reads of each sample were aligned using STAR (Dobin et al.,  
168 2013) with standard parameters for alignment with the *Bos taurus* genome (Ensembl and NCBI  
169 *Bos taurus* ARS-UCD1.2), and gene count was analyzed using featureCounts (Liao et al., 2014)  
170 implemented in the Rsubread package (Liao & Smyth, 2019).

#### 171 *Differential gene expression and functional enrichment analysis*

172 Genes were considered expressed when they presented more than 4 counts in at least 4  
173 samples. Differential gene expression analysis was performed using the DESeq2 package (Love  
174 et al., 2014), considering significance when the adjusted *p* values were less than 0.10 (Benjamini-  
175 Hochberg - "BH") and the absolute value of log2 foldchange was greater than 0.5. Additionally,  
176 we considered genes as differentially expressed if they were exclusive, expressed in one group (at  
177 least 5 counts in all technical replicates), and not expressed in the other group (zero counts in all  
178 technical replicates) within comparison and using the function filterByExpr from edgeR package  
179 (Robinson et al., 2010). We estimate the hub genes using CeTF (Biagi et al., 2021) based on RIF—  
180 Regulatory Impact Factor and PCIT—Partial Correlation and Information Theory (Reverter et al.,  
181 2010; Reverter & Chan, 2008). Gene ontology analysis was performed using clusterProfiler (Yu  
182 et al., 2012) and pathways explored using Pathview (Luo & Brouwer, 2013). Data were visualized  
183 using R software, in which we primarily observed the classification, intensity, and difference in  
184 expression between groups. Exploratory data analysis was performed with principal component  
185 analysis using plotpca function from DESeq2 (Love et al., 2014) and ggplot2 package (Wickham,  
186 2009), smearplots built with ggplot2 (Wickham, 2009), heatmaps using Ward.D2 clusterization  
187 method from pheatmap package (Kolde, 2019) and upsetplot using ComplexUpset package

188 (Krassowski, 2020; Lex et al., 2014). Moreover, data was cross-validated using human data  
189 previously published (Leng, Sun, & Huang, 2019) and submitted to Gene Expression Omnibus  
190 (GEO) under the GSE133856 accession code. The data was downloaded using prefetch from the  
191 SRA-toolkit and converted to fastq format. Human data was then aligned, and gene count was  
192 performed using the GRCh38.106 Human genome reference and processed according to the above-  
193 mentioned pipeline. Gene comparison between human and bovine genes was performed using only  
194 the human homolog genes, which were obtained with biomaRt (Durinck et al., 2005, 2011).

195

#### 196 *RNA extraction and RT-PCR*

197 For analysis of gene expression, Day-6 morula stage embryos were pooled in groups of 5.  
198 Blastocysts were analyzed individually. Each group was carried out in at least three biological  
199 replicates and each replicate was run in duplicate. Total RNA was extracted using the Arcturus  
200 PicoPure RNA Isolation kit (Life technologies) and reverse transcribed into cDNA using  
201 SuperScript Vilo (Invitrogen). Semi-quantitative RT-PCR was performed using the RotorGene  
202 SyBr Green PCR kit (Qiagen) in a Rotorgene Q PCR cycler under the following amplification  
203 conditions: 95°C for 5 min, followed by 40 cycles at 95°C for 5 secs and at 60°C for 10 secs.  
204 Primers were designed using Oligo6 software and the geometric means of three reference genes  
205 (*GAPDH*, *ACTB* and *SF3A*) were used for normalization. The stability of the reference genes  
206 across our samples was confirmed using Bestkeeper (Pfaffl et al., 2004). The list of all primers  
207 used can be found in **Table S1**.

208

#### 209 *Developmental potential and embryo quality evaluation*

210 The developmental potential was assessed as previously reported (Águila et al., 2017).  
211 Briefly, cleavage rate was recorded at 48 hours post fertilization (hpf), while morula and blastocyst  
212 development were recorded on days 6 and 8 post-fertilization, respectively. After assessment of  
213 development, embryos were either fixed for cell number evaluation or snap frozen in liquid N<sub>2</sub> and  
214 stored at -80 °C for RNA extraction. Embryo quality was assessed based on morphology and total  
215 cell number. Briefly, embryos at day 8 were classified morphologically as morula (compacted >30  
216 cells), early blastocyst (beginning of a blastocoel cavity), expanded blastocyst (cavity larger than

217 the embryo and zona pellucida thinning), and hatched blastocyst (complete extrusion from zona  
218 pellucida).

219

## 220 *Immunostaining*

221 Immunostaining was performed as described previously (Sampaio et al., 2020). Embryos  
222 were collected and washed in PBS with PVA and fixed with 4% paraformaldehyde for 15 min and  
223 permeabilized with D-PBS with 1% Triton X-100 for 30 min. After blocking for 2 h in D-PBS  
224 with 0.1% Triton X-100, 1% BSA, and 5% goat serum (Gibco, NZ), embryos were placed in  
225 primary antibody solution consisting of blocking buffer, a mouse antibody anti-Sox2 (Abcam  
226 ab10005 at 1:500) and rabbit antibody anti-Cdx2 (Abcam ab10305 at 1:500) overnight at 4 °C.  
227 After washing 3 × for 10 min and 3 × for 20 min each, embryos were incubated with secondary  
228 antibodies (1:2000) Alexa Fluor 594-conjugated goat anti-rabbit IgG (Life Tech, cat. # A-11036)  
229 and Alexa Fluor 488-conjugate goat anti-mouse IgG (Life Tech, cat. #: A-11029) both at RT for 1  
230 h. Finally, embryos were washed 3× for 10 min and 3× for 20 min each, mounted on slides with  
231 Prolong Gold Antifade with DAPI (Life Tech, cat. # P36935), and evaluated using confocal  
232 microscopy (Olympus FV 1000 laser-scanning confocal microscope).

233

## 234 *Statistical analysis.*

235 Quantitative data sets are presented as means and standard deviation ( $\pm$  S.D) and analyzed  
236 using one-way ANOVA. Post hoc analysis to identify differences between groups was performed  
237 using Tukey test. Binomial data sets, such as pronuclear formation, were analyzed by using Fisher  
238 test. Differences were considered significant at  $p < 0.05$ . Figures and statistical analysis were  
239 obtained using the software R (<https://www.R-project.org/>).

240

## 241 **Results**

242

### 243 *Global transcriptomic features of day-6 morula-stage haploid embryos*

244 To examine gene expression patterns of uniparental haploid (androgenetic and  
245 parthenogenetic) bovine embryos, we sequenced the transcriptome from individual morula stage

246 embryos, including biparental (BI) ICSI-derived embryos as control. In total, we obtained about  
247  $373.9 \times 10^6$  reads of clean data from 5 individual embryos per group (**Fig. S1**). The mapping rate  
248 was above 85% using STAR with bovine reference genome ARS-UCD1.2 from ENSEMBL and  
249 NCBI (redundant genes were removed to build only one count table). After quality control, a total  
250 of **21941 genes** were considered as expressed transcripts. We performed clustering of haploid and  
251 biparental (ICSI) embryos using principal component analysis (PCA), heatmapping, and volcano  
252 plots. In addition, High Pearson correlation coefficients were found among biological replicates  
253 with R-values of 0.954, 0.944 and 0.887 for BI, hPE, and hAE respectively, demonstrating the  
254 reproducibility of sample preparation and the sequencing protocols. While PCA revealed clear  
255 grouping between hPE and biparental ICSI embryos, hAE samples were clearly unrelated to the  
256 samples from the other groups (**Fig. 1A**). Differential expression analysis between the hAE and  
257 ICSI samples identified 2347 differentially expressed genes (DEGs), 12 genes were exclusively  
258 expressed in ICSI, 432 mRNAs and 18 transcriptional factors (TFs) were considered hub genes  
259 between androgenotes and ICSI embryos (**Fig. 1B**). When comparing androgenotes versus  
260 parthenotes we identified 1523 DEGs, 1 gene (LOC100849023) that was exclusively expressed in  
261 hAE, 6 genes were exclusively expressed in hPE, 447 mRNAs and 17 TFs that were considered  
262 hub genes (**Fig. 1C**). Comparisons of parthenotes and biparental groups identified 55 DEGs, of  
263 which 5 genes were exclusively expressed, 238 mRNAs and 7 TFs hub genes. In general, the  
264 number of varying genes between parthenotes and ICSI was smaller when compared hAE against  
265 biparental ICSI or hPE, indicating a higher level of discordance of the androgenetic group. To  
266 identify shared regulations, we compared the sets of more expressed genes obtained from each  
267 group (**Fig. 1E**). More than 60% (1602/2608) of DEGs were present in androgenotes, 16%  
268 (415/2608) in ICSI and only 8% (202/2608) in hPE. The highest intersection was found between  
269 transcriptomes of ICSI and hPE (345 genes, representing 45% and 65% of the total number of up-  
270 regulated genes for ICSI and parthenotes, respectively) (**Fig. 1E**). In contrast, the intersection  
271 between transcriptomes of ICSI and hAE was considerably lower (only 33 genes representing 4%  
272 and 2% of the total number of more expressed genes for ICSI and androgenotes, respectively) (**Fig.**  
273 **1E**). In a similar fashion, the intersection between hPE and hAE was even smaller (11 genes,  
274 representing 2% and 0.7% of the total number of more expressed genes for parthenotes and  
275 androgenotes, respectively) (**Fig. 1E**). Moreover, hierarchical clustering of DEGs showed a similar  
276 clustering by the heat map between the hPE and BI embryos and a clear contrast to the hAE group

277 (Fig. 1F). Heatmap of top fifty DEGs between biparental and haploid androgenetic embryos is  
278 shown in Fig. 1G. Among the top fifty more DEGs between parthenotes and biparental embryos,  
279 the maternally expressed imprinted gene *MEG3* was more represented in parthenotes compared to  
280 ICSI. In contrast, imprinted genes *SNRPN* and *SNURF*, both expressed exclusively from the  
281 paternal allele, were highly expressed in androgenotes and biparental groups compared to hPE.  
282 Altogether, a differential transcriptional profile of imprinted genes in hAE and hPE supports their  
283 respective parental origin.

284 A total of 1194 DEGS were identified in the KEGG pathways ontology analysis.  
285 Comparative KO analysis between the androgenote and control groups revealed enrichment of  
286 genes participating in the ribosome, glycosaminoglycan degradation, ubiquitin mediated  
287 proteolysis, apeling signalling, protein export, RNA polymerase, and interestingly pathways  
288 related to embryonic development (Hippo and WNT signaling). In contrast, haploid androgenetic  
289 embryos showed a loss of pathways related to cellular metabolism (steroid biosynthesis, cysteine,  
290 and methionine metabolism, biosynthesis of amino acids, cholesterol metabolism, citrate cycle,  
291 pyruvate metabolism, among others), regulation of actin cytoskeleton, phagosome, tight junction,  
292 and DNA replication activities compared to control groups (Fig. 1J). Overall, these results suggest  
293 a dramatic influence of the parental genome of haploid morula stage embryos on their  
294 transcriptomic profile and reveal that while biparental embryos often share the transcriptomic  
295 profile of parthenogenetic embryos, androgenotes show substantial quantitative and qualitative  
296 differences in their transcripts during early embryogenesis.

297

### 298 *Unbalanced signaling regulating pluripotency in uniparental haploid embryos*

299 Haploid androgenetic development in the bovine is characterized by poor morphological  
300 quality associated with a lower potency to expand and form blastocoele (Aguila et al., 2021; Vichera  
301 et al., 2011). Thus, we were interested in obtaining deeper insights regarding the pluripotency  
302 features of bhAE. Again, the PCA analysis revealed that androgenetic samples presented the most  
303 diverse clustering pattern, while both parthenogenetic and biparental samples were similar (Fig.  
304 2A-C). In the same fashion, heatmap analysis showed a homogeneous profile between biparental  
305 and parthenotes, but a differential for hAE, where the counting of *GSK3B*, *FZD1*, *ID4*, *ID2*,  
306 *ESRRB*, *TCF7*, *JAK1*, and *ISL1* transcripts was higher (Fig. 2D). Pathview analysis showed that



307 core factors JAK, BMP4 and GSK3B were overexpressed and FGF less active in androgenotes  
308 compared to control embryos (**Fig. 2E-F**). Instead, core factors AKT, BMP4, FGF and GSK3B  
309 were more expressed in biparental ICSI embryos, but fewer amounts of JAK, BMP4, TCF1, ID  
310 and ESRRB were found when compared to parthenogenetic samples (**Fig. 2G**). Interestingly, the  
311 well-known TE lineage markers (CDX2 and DAB2) as well as ICM markers (POU5F1 and  
312 NANOG) were not among the most variable genes, indicating nascent TE and ICM lineages. These  
313 data suggest unbalanced pluripotency of uniparental haploid embryos, a potential link to their  
314 inefficient ability to undergo blastulation.

315 The WNT (Wingless-related integration site) pathway regulates crucial aspects of cell fate  
316 determination and embryonic development. Previous studies have shown that WNT activation via  
317 blocking GSK3B from the morula stage onwards improves blastocyst morphology and epiblast-  
318 specific gene expression (Harris et al 2013; Madeja et al 2015). To further analyze whether the  
319 developmental constraints of uniparental haploid embryos are associated to altered pluripotency,  
320 we focused our analytical pipeline on the expression profiles of WNT-related genes. The PCA was  
321 segregated differentially in androgenetic samples compared to biparental and parthenogenetic  
322 groups (**Figure 3 A-C**). Moreover, the heatmap evidenced a strong expression of WNT genes in  
323 androgenotes, particularly for GSK3B, suggesting an alteration to the WNT pathway (**Fig. 3D**).  
324 Once again, path-view indicates a differential expression of key factors of the canonical (RSPO,  
325 FRP, GSK3B, TCF/LEF, gamma-Catenin, and PPAR gamma), p53 signaling (Siah1), planar cell  
326 polarity (Daam and RhoA) and calcium-dependent (NFAT) Wnt pathways in hAE compared to  
327 ICSI and parthenotes (**Fig. 3E, F**). Finally, pathway analysis also showed overrepresentation of  
328 canonical (BAMBI, GSK3B) and planar cell polarity (Daam1 and RhoA) signalling in biparental  
329 ICSI compared to hPE (**Fig. 3G**). Together, the RNAseq analysis indicates higher heterogeneity  
330 in WNT activity among groups, predominantly for GSK3B.

331 To identify genes that are central and highly connected to pluripotency networks, we conducted  
332 hub gene identification analysis using the CeTF package. We assigned all protein coding genes  
333 (mRNAs) with an absolute RIF value > 2 as hub genes. These analyses identified 4 genes from  
334 the WNT-pathway associated with pluripotency, 3 genes from the WNT-pathway related to Hub  
335 genes, and 2 genes associated with pluripotency were related to Hub genes. Importantly, the only  
336 gene from the WNT-signalling pathway that was associated with pluripotency and Hub genes was  
337 GSK3B (**Fig. 3H**). Together, these data indicated unbalanced pluripotency signaling, but also



338 identified potential key regulators of cell differentiation, highlighting those transcriptomic  
339 differences, could be associated with the poor developmental competence observed in haploid  
340 phenotypes.

341

342 *Uniparental human and bovine morula-stage embryos share analogous imprinting profile*

343 Next, to corroborate our finding, we performed *in silico* validation via bioinformatic  
344 analysis of previously published transcriptomic data of human uniparental (diploid) and biparental  
345 (ICSI) morula-stage embryos (Leng, Sun, Huang, et al., 2019). PCA revealed a similar clustering  
346 pattern between hPE and biparental embryos, and again androgenetic samples were grouped more  
347 distant from the other groups (Fig. 4A). The heatmap of human homologous genes revealed a  
348 closer profile between biparental and diploid androgenetic embryos, while diploid parthenogenetic  
349 embryos differed from the other groups (Fig. 4B, C). In contrast, our bovine data indicated a clear  
350 similarity between biparental ICSI and hPE, while hAE displayed a different profile (Fig. 4B, C).  
351 Due to the dissimilar transcriptomic pattern between bovine and human samples, we focused our  
352 analysis on the expression of imprinted genes. Uniparental embryos possess only one (haploid) or  
353 two (diploid) copies of either the paternal or maternal genomes and, therefore, lack gene transcripts  
354 expressed monoallelically from either one or the other. This analysis showed analogous clustering  
355 of imprinted genes in bovine and human data. For instance, the paternally expressed SNRPN,  
356 PEG10, PLAGL1, and KCNQ1OT1 genes were present abundantly in androgenetic but barely  
357 expressed in parthenogenetic samples (Fig. 4D, E). On the opposite, maternally expressed genes  
358 such as MEG8, MEG3, and GAB1 were more present in parthenogenetic rather than androgenetic  
359 samples (Fig. 4D, E). Thus, these data indicate that uniparental human and bovine embryos share  
360 similar imprinting profiles, regardless of their ploidy condition.

361 We next sought to examine signaling pathways regulating pluripotency in uniparental  
362 human data by applying our bioinformatics pipeline. Contrary to bovine data, we found that PIK3,  
363 ERK1/2, and Dvl pathways were more active in human androgenetic samples than in diploid  
364 parthenotes. Noticeably, GSK3B was not active, and B-catenin was less represented in diploid  
365 androgenotes (Fig. 4F). On the other hand, diploid androgenetic data showed that most of the  
366 signaling pathways were less active (JAK/STAT3, SMADs, Wnt/B-catenin, Mek/ERK) when  
367 compared to ICSI (Fig. 4G). Altogether, bioinformatic *in silico* analysis of human published data

368 indicated that uniparental androgenetic diploid embryos display different transcriptomic patterns  
369 compared to bovine hAE, while the imprinting profile is relatively conserved between species.

370

371 *Pluripotency and WNT-associated transcripts are altered in haploid androgenetic day-6 morula*  
372 *stage embryos*

373 To further validate results obtained by transcriptomic analysis, we analyzed the expression  
374 of pluripotency and WNT-related genes via qRT-PCR. We showed that NANOG, KFL4, and  
375 GSK3B were upregulated, but also CDX2 and AXIN2 were downregulated in hAE morula  
376 embryos when compared to hPE and biparental ICSI (**Fig. 5A**). SOX2 and CTNNB1 showed  
377 overexpression in hAE but only when compared to biparental groups (**Fig. 5A**). Interestingly, ICSI  
378 and hPE that remained at the morula stage at day-7 did not show major differences with  
379 androgenotes, indicating a resemblance among developmentally retarded hAE and biparental and  
380 hPE groups (**Fig. 5B**). These results confirm that morula-stage day-6 hAE have unbalanced  
381 pluripotency and a dysregulated expression of the WNT-pathway factors CTNNB1, GSK3B and  
382 AXIN2.

383

384 *GSK3B inhibition improves the development in vitro of haploid androgenetic embryos*

385 WNT signalling promotes the expression of key pluripotency-related genes and the  
386 stabilization of ICM lineage in bovine embryos (Madeja et al., 2015). Because the transcript  
387 analysis revealed the overexpression of GSK3B in bhAE concurrent with a failure to form  
388 competent morula at day-6, we evaluated the effect of exposing haploid androgenetic embryos  
389 from day 5 onward to the GSK3B-inhibitor CHIR99021 on their developmental potential. Apart  
390 from the unexposed control groups, a DMSO control was used as a vehicle control. In the absence  
391 of CHIR99021, morula and blastocyst development were lower in the hAE compared to biparental  
392 and hPE (**Table 1**). However, when hAE morula-stage embryos were cultured in presence of  
393 CHIR99021, the proportion of blastocyst increased significantly compared to the vehicle-control  
394 group (78% vs 31% for CHIR99021 and DMSO, respectively), enabling a similar blastulation rate  
395 (79%) to control groups (78% and 75% for ICSI and hPE, respectively) (**Table 1**). Additionally,  
396 although morphology was not affected by GSK3B inhibition in biparental and haploid  
397 parthenogenetic embryos (**Table S2**), blastocyst morphology of hAE was remarkably improved as

398 indicated by the presence of expanding/expanded embryos that were not observed in the absence  
399 of CHIR99021 (**Fig. 6 A,B, Table S2**). Thus, inhibition of GSK3B from the morula stage onward  
400 enhances the developmental competence of bovine hAE.

401

#### 402 *Transcripts of pluripotency and WNT-related genes are unaffected by GSK3B inhibition*

403 To investigate the mechanisms involved in the improvement of haploid androgenetic  
404 development caused by GSK3B inhibition, we compared the transcript levels of pluripotency and  
405 WNT-related genes in day-8 blastocyst stage embryos cultured in CHIR99021 (GSK3B-  
406 inhibition) via RT-PCR. First, we corroborate that DMSO (0.001% v/v) and CHIR99021 did not  
407 affect expression of reference genes used for normalizations (**Fig. S1**). We next analyzed the  
408 expression of the same panel of pluripotency-related genes evaluated at the morula stage, but  
409 including blastocysts produced by IVF (females) as control. Compared to biparental and  
410 parthenotes, GSK3B expression was higher ( $p < 0.05$ ) in hAE, both in the presence and absence of  
411 CHIR99021 (**Fig. 7**), indicating that the inhibition of GSK3B does not interfere with the  
412 transcriptional levels of the gene. Apart from POU5F1, no differences were observed between  
413 hAE and biparental embryos (**Fig. 7**). Although NANOG transcript were not affected by  
414 CHIR99021 in any group, a variable overexpression was observed among haploid androgenetic in  
415 comparison to parthenogenetic embryos when cultured in presence of DMSO (**Fig. 7**). Overall,  
416 these results indicate that the developmental improvement resulting from the exposure of hAE to  
417 GSK3B inhibition does not rely on changes in the levels of key factors involved in embryonic  
418 pluripotency and/or WNT-signaling pathway.

419

#### 420 *Low ICM:TE ratio of hAE cannot be rescued by GSK3B-inhibition*

421 To further unravel the role of GSK3B on the developmental competence of haploid  
422 androgenotes, we compared total cell number and allocation to inner-cell-mass (ICM) and  
423 trophectoderm (TE) in hAE blastocyst exposed or not to CHIR99021. To do so, we performed  
424 immunostaining to SOX2 and CDX2, known bovine specific markers of the ICM and TE cells,  
425 respectively. Biparental (ICSI) and hPE were used as controls. Regardless of the presence of  
426 CHIR99021, hAE contained fewer total cell numbers (DNA-stain), and fewer SOX2- and CDX-2  
427 positive cells (**Fig. 8A, B**). However, the proportional representation of ICM:TE ratio was

428 significantly lower in androgenetic embryos in relation to total cells when compared to ICSI and  
429 parthenogenetic blastocysts (**Fig. 8A, B**). On the other hand, CDX2-positive cells were present in  
430 higher percentages (around 90%) in hAE than in hPE or ICSI (**Fig. 8A, B**). Moreover, no difference  
431 in the amount or proportion of SOX2-expressing cells at the blastocyst stage exists between hAE  
432 exposed or not to CHIR99021 (**Fig. 8B**). The limited presence of SOX2-positive cells in  
433 androgenetic development was further evidenced on day 10 hAE cultured in the presence of  
434 GSK3B inhibitor CHIR99021 (**Fig. 8B**). Thus, these results show that hAE privilege TE  
435 differentiation during blastulation and that GSK3B inhibition cannot rescue the embryos to form  
436 a proper ICM:TE ratio.

437

## 438 **Discussion**

439 We hereby have performed a comprehensive analysis of the transcriptomic profiles of  
440 uniparental haploid and biparental bovine embryos. Our data showed that biparental and hPE  
441 embryos share a closer transcriptomic profile at the morula stage when compared to haploid  
442 androgenetic transcriptome. Besides, the main pathways associated with pluripotency are  
443 unbalanced in haploid androgenetic samples, particularly for genes associated with WNT  
444 signaling. Moreover, we show that GSK3B-inhibition enhances the developmental potential of  
445 haploid androgenetic morula-stage embryos. Finally, haploid androgenetic blastocysts have lower  
446 quality in terms of cell number and ICM formation, indicating a preferential differentiation  
447 towards TE lineage that cannot be reversed by GSK3B-inhibition.

448 Previous studies in mammals have established that the androgenetic embryos have reduced  
449 developmental competence from the morula to the blastocyst stage (Aguila et al., 2021; Hu et al.,  
450 2015; Lagutina et al., 2004; Latham et al., 2002; Matsukawa et al., 2007; Vichera et al., 2011; S.  
451 Wang et al., 2017; Xiao et al., 2013; H. Zhang et al., 2014). Moreover, androgenetic embryos that  
452 progress beyond ZGA underwent a second developmental arrest at the morula stage (Aguila et al.,  
453 2021). Here, we hypothesized that developmental restriction of bovine morula-stage hAE is  
454 associated with poor pluripotency. We first investigated the global transcriptomic profile in  
455 uniparental haploid and biparental samples. As reported for human uniparental embryos (Leng,  
456 Sun, Huang, et al., 2019), our analysis showed that biparental and parthenogenetic embryos share  
457 similar transcriptomic profiles during early embryonic development. Although it is possible that  
458 some oocyte-derived transcripts were never degraded, androgenetic samples showed highly

459 heterogeneous transcriptomic profiles compared to the ICSI and parthenogenetic groups,  
460 indicating that most oocyte-derived RNAs were no longer present at the morula stage. Because the  
461 developmental potential of parthenotes is relatively similar to those of sperm fertilized  
462 counterparts in several animal models (Cai et al., 2020; Grupen et al., 1999; Mitalipov et al., 2001),  
463 including humans (Mai et al., 2007), this finding rises the possibility that once ZGA has occurred,  
464 newly-derived transcripts of maternal origin (nascent from maternal alleles) may play a more  
465 essential role during early stages of embryo development in mammalian species.

466 On the other hand, as previously reported (Aguila et al., 2021; Hu et al., 2015; Latham et  
467 al., 1994; Ogawa et al., 2006; Sotomaru et al., 2001), we report perturbed imprinting expression  
468 patterns during uniparental development with the overexpression of maternally expressed  
469 imprinted genes in parthenotes and overexpression of paternally expressed imprinted genes in  
470 androgenotes, consistent with the notion that the absence of the reciprocal parental allele leads to  
471 the overexpression of imprinted genes. This differential imprinting expression pattern of haploid  
472 embryos determines not only the parental origin of the embryo (Daughtry & Mitalipov, 2014;  
473 Sritanaudomchai et al., 2010) but also its association with developmental outcomes (Aguila et al.,  
474 2021; Bos-Mikich et al., 2016; Latham et al., 2002). For instance, embryos with only the maternal  
475 genome show altered expression patterns of key enzymes required for epigenetic reprogramming  
476 (Aguila et al., 2021; Kono, 2006; Peng et al., 2015; Sagi et al., 2019)

477 In a similar fashion, the bioinformatic analysis revealed a differential profile of  
478 pluripotency factors, particularly an unbalanced WNT pathway of overrepresented canonical  
479 factors. In the bovine species, modulation of the activity of WNT signaling is necessary for  
480 development of ESC (Bogliotti et al., 2018; Xiao, Sosa, et al., 2021). In addition, we identified  
481 that GSK3B, a key factor of the canonical WNT signalling pathway, is a central hub gene for  
482 haploid androgenetic development and may function as a “master regulator” of gene expression  
483 and developmental transition during the first cell-fate differentiation (Denicol et al., 2013; Madeja  
484 et al., 2015; Tribulo et al., 2017; Warzych et al., 2020).

485 Nonetheless, our “in silico” cross-species analysis revealed different transcriptomic  
486 profiles of homologous genes between human uniparental diploid and bovine haploid embryos at  
487 the morula stage. However, imprinting expression appears conserved in uniparental samples across  
488 both species. Comparing uniparental and bi-parental embryos by genome-wide technologies is  
489 useful for identifying imprinted genes (Sagi et al., 2019; Stelzer et al., 2015). Our results confirmed

490 the imprinting behavior of most of the genes previously described for bovine species, but also  
491 raised the existence of potential imprinting loci not described for the bovines but reported as  
492 imprinted in humans. Therefore, the expression profiles established in this report can therefore  
493 serve as a reference base for bovine species, since the identification of imprinted genes in livestock  
494 species lags behind human and mouse data (O’Doherty et al., 2015).

495 Further investigation into transcripts of a panel of pluripotency ICM/TE specific lineage  
496 markers revealed abnormal expression of the pluripotency factor KLF4 and other markers of ICM,  
497 (i.e. NANOG, SOX2, and/or the TE marker CDX2), and genes associated with WNT pathway, i.e.  
498 GSK3B, AXIN2, and CTNBL1. The KLF gene family is likely involved in directing gene  
499 reprogramming during EGA in bovine embryos (Bogliotti et al., 2020), and KLF4 is specifically  
500 required for both ES cell self-renewal and maintenance of pluripotency by regulating NANOG  
501 expression (P. Zhang et al., 2010). On the other hand, NANOG, POU5F1, and SOX2 are the core  
502 pluripotency transcription factors supporting stem self-renewal and blastocyst potency (Avilion et  
503 al., 2003; Bogliotti et al., 2018; Chambers et al., 2003; Mitsui et al., 2003; Sakurai et al., 2016).  
504 For instance, disruption of POU5F1 prevented blastocyst formation and was associated with the  
505 bovine embryonic arrest at the morula stage (Daigneault et al., 2018). Similarly, the  
506 downregulation of SOX2 compromised the expression of NANOG and preimplantation  
507 development (Goissis & Cibelli, 2014), and the deletion of NANOG impaired epiblast formation  
508 in the bovine ICM (Mitsui et al., 2003; Ortega et al., 2020). Moreover, CDX2 knockdown in bovine  
509 blastocysts resulted in poorly elongated embryos due to reduced TE cell proliferation (Berg et al.,  
510 2011). Others have indicated that non-competent embryos have an unbalanced overexpression of  
511 NANOG and SOX2 (Velásquez et al., 2019). Similarly, bovine embryos with a decreased  
512 developmental competence show increased transcription rates of pluripotency markers (Khan et  
513 al., 2012). Aberrant POU5F1 and SOX2 expression in bovine cloned blastocysts have also been  
514 related to low developmental competence (Hall et al., 2005; Rodríguez-Alvarez et al., 2010, 2013).  
515 In this study, we also recorded more similar expressions of pluripotency genes among “less  
516 competent” embryos that were arrested at the morula stage. Previous reports and our findings  
517 suggest that a balanced expression of pluripotency genes is required during early development,  
518 most likely to maintain appropriate regulation of differentiation and cell proliferation. Indeed, the  
519 absence of the maternal genome in androgenetic embryos raises the likelihood of unbalanced gene  
520 expression not only of imprinted but also of non-imprinted genes.



521 In mice (Ogawa et al., 2006) and humans (Sagi et al., 2019) androgenetic blastocysts have  
522 a lower number of cells and are associated with hindered blastulation. Our previous study also  
523 reported a poor blastulation rate (26%) for hAE compared to biparental (80%) or hPE (68%)  
524 (Aguila et al., 2021). Notably here, GSK3B inhibition enhanced embryonic competence by  
525 increasing the “blastulation rate”, seen as the proportion of morulas becoming blastocysts. This  
526 effect may be associated with the inhibition of an unbalanced GSK3B. However, further studies  
527 are needed to determine not only the mRNA levels but also the protein levels of GSK3B in hAE  
528 samples. These findings agree with others that also report positive effects of GSK3B inhibition on  
529 the developmental competence and quality of bovine embryos (Aparicio et al., 2010; Harris et al.,  
530 2013; Meng et al., 2015).

531 Evaluation of the same panel of transcripts at the blastocyst stage indicated subtle  
532 differences among hAE (cultured with DMSO or CHIR99021) and control groups. For instance,  
533 although GSK3B remained overexpressed in hAE, the other pluripotency-related transcripts  
534 remained similar among groups. According to the study of Madeja et al., (2015), GSK3B  
535 inhibition is enough to elevate the expression of POU5F1 and NANOG in both the ICM and TE.  
536 In line with these findings, others have indicated that GSK3B inhibition leads to the formation and  
537 stabilization of the ICM by promoting the expression of ICM lineage-specific markers  
538 POU5F1 and NANOG (Warzych et al., 2020). However, it has been also reported that WNT  
539 activation from the morula stage onwards does not have major effects on the ICM compartment  
540 (Kuijk et al., 2012). Although we did not observe huge differences at the transcript level, a  
541 phenotypic change towards higher morphological quality was recorded under WNT-activated  
542 conditions. Therefore, we postulate that bovine hAE are unable to undergo cell fate differentiation  
543 during the transition from morula to blastocyst due, at least in part, due to an unbalanced WNT  
544 signaling. Our hypothesis is that activation of WNT/b-catenin signaling facilitates the formation  
545 of self-renewing pluripotent cell lines from bovine biparental blastocysts (Ozawa et al., 2012).  
546 Nonetheless, others have indicated that WNT-activation impairs blastocyst formation and embryo  
547 quality (Denicol et al., 2013; Tribulo et al., 2017; Xiao, Amaral, et al., 2021). Moreover, inhibition  
548 of WNT signaling was necessary to derive stable pluripotent ESC expressing pluripotency factors  
549 SOX2 and POU5F1 (Bogliotti et al., 2018). Nonetheless, it is noteworthy that haploid androgenetic  
550 embryos may respond differently to signaling inhibition when compared to biparental embryos  
551 since the lack of the maternal genome creates unbalanced signaling pathways during early



552 development. Thus, the precise underlying mechanisms responsible for the actions of WNT  
553 activation on the early development of bovine hAE require further elucidation.

554 Additionally, our immunoassay confirmed that the number of cells expressing SOX2  
555 regarding total and/or CDX2-positive cells were significantly lower in hAE blastocysts. Although  
556 GSK3B inhibition was unable to reverse such an anomaly, CHIR99021 exposure appears to shift  
557 androgenotes towards an improved ICM:TE ratio. In mice, the absence of SOX2 promotes stem  
558 cell specification toward TE lineage (Masui et al., 2007; Tremble et al., 2021). In this line, it is  
559 widely known that androgenetic blastomeres preferentially differentiate in trophectoderm (Barton  
560 et al., 1984; McGrath & Solter, 1984; Surani et al., 1984). Moreover, WNT/b-catenin signaling  
561 can also stimulate trophectoderm differentiation during early embryo development (Denicol et al.,  
562 2013; Krivega et al., 2015; Soto et al., 2021; Xiao, Amaral, et al., 2021). In agreement, WNT-  
563 YAP/TAZ signaling regulates the differentiation of trophoblast stem cells with properties that  
564 resemble the trophectoderm of bovine blastocysts (C. Wang et al., 2019). In addition, a recent  
565 report indicated that culturing with CHIR99201 affects the number of SOX2-positive cells in  
566 bovine blastocysts (Xiao, Sosa, et al., 2021). Thus, it will be important in future studies to seek  
567 strategies capable of improving ICM-specification of bovine hAE. In the same context, the lack of  
568 SOX2 protein detected in hAE did not coincide with its mRNA levels. Since the abundance of  
569 proteins cannot be accurately predicted from mRNA profiles and changes in mRNA levels can  
570 explain at most 40% of the variability in protein levels (Schwanhäusser et al., 2013; Tian et al.,  
571 2004), it is not surprising to find that protein abundance of SOX2 did not match its transcripts  
572 levels. In fact, studies in mice (Lu et al., 2009) and bovine (Warzych et al., 2020) ESC have also  
573 disclosed that overall changes in protein levels are not accompanied by changes in the expression  
574 of the analogous mRNAs.

575 In conclusion, we have shown that the parental genome of haploid embryos severely  
576 influences the transcriptomic profile. Furthermore, it is revealed, for the first time, that early  
577 biparental development shares a transcriptomic profile closer to parthenogenetic development. In  
578 addition, the poor developmental potential and deficient blastulation rate of bovine haploid  
579 androgenetic embryos are associated with unbalanced pluripotency and expression of genes  
580 associated with the WNT pathway and cell fate differentiation. We have also shown that in cattle,  
581 similarly to other mammalian models, androgenetic-derived embryos preferentially differentiate  
582 towards the trophectoderm lineage, which could be associated with the lack of a defined ICM.

583 Future studies will aim to analyze the effects of activation/inhibition of other signaling pathways  
584 involved in cell fate differentiation and pluripotency on the developmental potential of bovine  
585 haploid embryos.

586

### 587 **Author Contributions**

588 LA, RPN, JT and LS contributed to the conception and design of the study. LA, RVS, JT,  
589 RF and FM contributed to experimental procedures, including embryo production, manipulations,  
590 and molecular analysis. RPN performed bioinformatic analysis. LA, RPN, RF, FM, and LS  
591 interpreted the bioinformatic results. LA, JT, RPN, RF, and LS wrote the manuscript. All authors  
592 contributed to the manuscript revision, and read, and approved the submitted version.

593

### 594 **Funding**

595 This work was funded by a grant from NSERC-Canada with Boviteq inc. (CRDPJ 536636-  
596 18 and CRDPJ 487107-45 to LS), and by the São Paulo Excellence Chair (SPEC) program of  
597 FAPESP, Brazil. A scholarship by the National Agency for Research and Development  
598 (ANID)/Scholarship Program/POSTDOCTORADO BECAS CHILE/2017 – 74180059 (LA), and  
599 Programa de Formacion de Investigadores Postdoctorales, Universidad de La Frontera (PDT21-  
600 0001).

601

### 602 **Conflict of Interest**

603 The authors declare that the research was conducted in the absence of any commercial or  
604 financial relationships that could be construed as a potential conflict of interest.

605

### 606 **Acknowledgments**

607 The authors thank Drs. Patrick Blondin and Remi Labrecque from BOVITEQ Inc. for their  
608 scientific and technical input. The authors also The authors acknowledge to the server  
609 infrastructure of Soroban (SATREPS MACH – JPM/JSA1705) at Centro de Modelación y  
610 Computación Científica at Universidad de La Frontera..

611

### 612 **Supplementary Material**

613

614

## 615 **References**

616

- 617 Aguila, L., Suzuki, J., Hill, A. B. T., García, M., de Mattos, K., Therrien, J., & Smith, L. C.  
618 (2021). Dysregulated Gene Expression of Imprinted and X-Linked Genes: A Link to Poor  
619 Development of Bovine Haploid Androgenetic Embryos. *Frontiers in Cell and*  
620 *Developmental Biology*, 9. <https://doi.org/10.3389/fcell.2021.640712>
- 621 Águila, L., Zambrano, F., Arias, M. E., & Felmer, R. (2017). Sperm capacitation pretreatment  
622 positively impacts bovine intracytoplasmic sperm injection. *Molecular Reproduction and*  
623 *Development*, 84(7), 649–659. <https://doi.org/10.1002/mrd.22834>
- 624 Andrews, S., Wingett, S. W., & Hamilton, R. S. (2018). *FastQ Screen : A tool for multi-genome*  
625 *mapping and quality control [ version 2 ; referees : 4 approved ] Referee Status : 0*, 1–13.  
626 <https://doi.org/10.12688/f1000research.15931.1>
- 627 Aparicio, I. M., Garcia-Herreros, M., Fair, T., & Lonergan, P. (2010). Identification and  
628 regulation of glycogen synthase kinase-3 during bovine embryo development.  
629 *REPRODUCTION*, 140(1), 83–92. <https://doi.org/10.1530/REP-10-0040>
- 630 Avilion, A. A., Nicolis, S. K., Pevny, L. H., Perez, L., Vivian, N., & Lovell-Badge, R. (2003).  
631 Multipotent cell lineages in early mouse development depend on SOX2 function. *Genes &*  
632 *Development*, 17(1), 126–140. <https://doi.org/10.1101/gad.224503>
- 633 Bai, M., Han, Y., Wu, Y., Liao, J., Li, L., Wang, L., Li, Q., Xing, W., Chen, L., Zou, W., & Li, J.  
634 (2019). Targeted genetic screening in mice through haploid embryonic stem cells identifies  
635 critical genes in bone development. *PLOS Biology*, 17(7), e3000350.  
636 <https://doi.org/10.1371/journal.pbio.3000350>
- 637 Bai, M., Wu, Y., & Li, J. (2016). Generation and application of mammalian haploid embryonic  
638 stem cells. *Journal of Internal Medicine*, 280(3), 236–245.  
639 <https://doi.org/10.1111/joim.12503>
- 640 Barton, S. C., Surani, M. A. H., & Norris, M. L. (1984). Role of paternal and maternal genomes  
641 in mouse development. *Nature*, 311(5984), 374–376. <https://doi.org/10.1038/311374a0>
- 642 Berg, D. K., Smith, C. S., Pearton, D. J., Wells, D. N., Broadhurst, R., Donnison, M., & Pfeffer,  
643 P. L. (2011). Trophectoderm Lineage Determination in Cattle. *Developmental Cell*, 20(2),  
644 244–255. <https://doi.org/10.1016/j.devcel.2011.01.003>
- 645 Biagi, C. A. O. De, Nociti, R. P., Brotto, D. B., Osvaldo, B., Ruy, P. D. C., Paulo, J., Ximenez,  
646 B., Livingstone, D., Figueiredo, A., Araújo, W., & Jr, S. (2021). CeTF : an R /  
647 Bioconductor package for transcription factor co-expression networks using regulatory  
648 impact factors ( RIF ) and partial correlation and information ( PCIT ) analysis. *BMC*  
649 *Genomics*, 1–8.
- 650 Bogliotti, Y. S., Chung, N., Paulson, E. E., Chitwood, J., Halstead, M., Kern, C., Schultz, R. M.,  
651 & Ross, P. J. (2020). Transcript profiling of bovine embryos implicates specific  
652 transcription factors in the maternal-to-embryo transition. *Biology of Reproduction*, 102(3),  
653 671–679. <https://doi.org/10.1093/biolre/iox209>
- 654 Bogliotti, Y. S., Wu, J., Vilarino, M., Okamura, D., Soto, D. A., Zhong, C., Sakurai, M.,  
655 Sampaio, R. V., Suzuki, K., Izpisua Belmonte, J. C., & Ross, P. J. (2018). Efficient  
656 derivation of stable primed pluripotent embryonic stem cells from bovine blastocysts.  
657 *Proceedings of the National Academy of Sciences*, 115(9), 2090–2095.  
658 <https://doi.org/10.1073/pnas.1716161115>

- 659 Bos-Mikich, A., Bressan, F. F., Ruggeri, R. R., Watanabe, Y., & Meirelles, F. v. (2016).  
660 Parthenogenesis and Human Assisted Reproduction. *Stem Cells International*, 2016, 1–8.  
661 <https://doi.org/10.1155/2016/1970843>
- 662 Cai, L., Jeong, Y., Jin, Y., Lee, J., Jeong, Y., Hwang, K., Hyun, S., & Hwang, W. (2020). Effects  
663 of human recombinant granulocyte-colony stimulating factor treatment during in vitro  
664 culture on porcine pre-implantation embryos. *PLOS ONE*, 15(3), e0230247.  
665 <https://doi.org/10.1371/journal.pone.0230247>
- 666 Chambers, I., Colby, D., Robertson, M., Nichols, J., Lee, S., Tweedie, S., & Smith, A. (2003).  
667 Functional Expression Cloning of Nanog, a Pluripotency Sustaining Factor in Embryonic  
668 Stem Cells. *Cell*, 113(5), 643–655. [https://doi.org/10.1016/S0092-8674\(03\)00392-1](https://doi.org/10.1016/S0092-8674(03)00392-1)
- 669 Cui, X.-S., Xu, Y.-N., Shen, X.-H., Zhang, L.-Q., Zhang, J.-B., & Kim, N.-H. (2011).  
670 Trichostatin A Modulates Apoptotic-Related Gene Expression and Improves Embryo  
671 Viability in Cloned Bovine Embryos. *Cellular Reprogramming*, 13(2), 179–189.  
672 <https://doi.org/10.1089/cell.2010.0060>
- 673 Daigneault, B. W., Rajput, S., Smith, G. W., & Ross, P. J. (2018). Embryonic POU5F1 is  
674 Required for Expanded Bovine Blastocyst Formation. *Scientific Reports*, 8(1), 7753.  
675 <https://doi.org/10.1038/s41598-018-25964-x>
- 676 Daughtry, B., & Mitalipov, S. (2014). Concise Review: Parthenote Stem Cells for Regenerative  
677 Medicine: Genetic, Epigenetic, and Developmental Features. *Stem Cells Translational  
678 Medicine*, 3(3), 290–298. <https://doi.org/10.5966/sctm.2013-0127>
- 679 Denicol, A. C., Dobbs, K. B., McLean, K. M., Carambula, S. F., Loureiro, B., & Hansen, P. J.  
680 (2013). Canonical WNT signaling regulates development of bovine embryos to the  
681 blastocyst stage. *Scientific Reports*, 3(1), 1266. <https://doi.org/10.1038/srep01266>
- 682 Dobin, A., Davis, C. A., Schlesinger, F., Drenkow, J., Zaleski, C., Jha, S., Batut, P., Chaisson,  
683 M., & Gingeras, T. R. (2013). STAR: ultrafast universal RNA-seq aligner. *Bioinformatics  
684 (Oxford, England)*, 29(1), 15–21. <https://doi.org/10.1093/bioinformatics/bts635>
- 685 Durinck, S., Moreau, Y., Kasprzyk, A., Davis, S., Moor, B. De, Brazma, A., & Huber, W.  
686 (2005). BioMart and Bioconductor : a powerful link between biological databases and  
687 microarray data analysis. *Bioinformatics (Oxford, England)*, 21(16), 3439–3440.  
688 <https://doi.org/10.1093/bioinformatics/bti525>
- 689 Durinck, S., Spellman, P. T., Birney, E., & Huber, W. (2011). Mapping Identifiers for the  
690 Integration of Genomic Datasets with the R/Bioconductor package biomaRt. *Nature Plants*,  
691 70(7), 2655–2664. <https://doi.org/10.1158/0008-5472.CAN-09-4373>.Vascular
- 692 Goissis, M. D., & Cibelli, J. B. (2014). Functional characterization of CDX2 during bovine  
693 preimplantation development in vitro. *Molecular Reproduction and Development*, 81(10),  
694 962–970. <https://doi.org/10.1002/mrd.22415>
- 695 Gomez, E., Caamano, J. N., Bermejo-Alvarez, P., Diez, C., Munoz, M., Martin, D., Carrocera,  
696 S., & Gutierrez-Adan, A. (2009). Gene Expression in Early Expanded Parthenogenetic and  
697 In Vitro Fertilized Bovine Blastocysts. *Journal of Reproduction and Development*, 55(6),  
698 607–614. <https://doi.org/10.1262/jrd.09-077M>
- 699 Grupen, C. G., Verma, P. J., Du, Z. T., McIlfatrick, S. M., Ashman, R. J., & Nottle, M. B.  
700 (1999). Activation of in vivo- and in vitro-derived porcine oocytes by using multiple  
701 electrical pulses. *Reproduction, Fertility and Development*, 11(8), 457.  
702 <https://doi.org/10.1071/RD00033>
- 703 Hall, V. J., Ruddock, N. T., & French, A. J. (2005). Expression profiling of genes crucial for  
704 placental and preimplantation development in bovine in vivo, in vitro, and nuclear transfer

- 705 blastocysts. *Molecular Reproduction and Development*, 72(1), 16–24.  
706 <https://doi.org/10.1002/mrd.20337>
- 707 Harris, D., Huang, B., & Oback, B. (2013). Inhibition of MAP2K and GSK3 Signaling Promotes  
708 Bovine Blastocyst Development and Epiblast-Associated Expression of Pluripotency  
709 Factors1. *Biology of Reproduction*, 88(3). <https://doi.org/10.1095/biolreprod.112.103390>
- 710 Horiuchi, T., Emuta, C., Yamauchi, Y., Oikawa, T., Numabe, T., & Yanagimachi, R. (2002).  
711 Birth of normal calves after intracytoplasmic sperm injection of bovine oocytes: a  
712 methodological approach. *Theriogenology*, 57(3), 1013–1024.  
713 [https://doi.org/10.1016/S0093-691X\(01\)00701-4](https://doi.org/10.1016/S0093-691X(01)00701-4)
- 714 Hu, M., Zhao, Z., TuanMu, L.-C., Wei, H., Gao, F., Li, L., Ying, J., & Zhang, S. (2015).  
715 Analysis of imprinted gene expression and implantation in haploid androgenetic mouse  
716 embryos. *Andrologia*, 47(1), 102–108. <https://doi.org/10.1111/and.12222>
- 717 Kawahara, M., Wu, Q., Takahashi, N., Morita, S., Yamada, K., Ito, M., Ferguson-Smith, A. C.,  
718 & Kono, T. (2007). High-frequency generation of viable mice from engineered bi-maternal  
719 embryos. *Nature Biotechnology*, 25(9), 1045–1050. <https://doi.org/10.1038/nbt1331>
- 720 Khan, D. R., Dubé, D., Gall, L., Peynot, N., Ruffini, S., Laffont, L., le Bourhis, D., Degrelle, S.,  
721 Jouneau, A., & Duranthon, V. (2012). Expression of Pluripotency Master Regulators during  
722 Two Key Developmental Transitions: EGA and Early Lineage Specification in the Bovine  
723 Embryo. *PLoS ONE*, 7(3), e34110. <https://doi.org/10.1371/journal.pone.0034110>
- 724 Kokubu, C., & Takeda, J. (2014). When Half Is Better Than the Whole: Advances in Haploid  
725 Embryonic Stem Cell Technology. *Cell Stem Cell*, 14(3), 265–267.  
726 <https://doi.org/10.1016/j.stem.2014.02.001>
- 727 Kolde, R. (2019). *pheatmap: Pretty Heatmaps. R package version 1.0.12*.
- 728 Kono, T. (2006). Genomic imprinting is a barrier to parthenogenesis in mammals. *Cytogenetic  
729 and Genome Research*, 113(1–4), 31–35. <https://doi.org/10.1159/000090812>
- 730 Kono, T., Obata, Y., Wu, Q., Niwa, K., Ono, Y., Yamamoto, Y., Park, E. S., Seo, J.-S., &  
731 Ogawa, H. (2004). Birth of parthenogenetic mice that can develop to adulthood. *Nature*,  
732 428(6985), 860–864. <https://doi.org/10.1038/nature02402>
- 733 Krassowski, M. (2020). *ComplexUpset*. <https://doi.org/10.5281/zenodo.3700590>
- 734 Krivega, M., Essahib, W., & van de Velde, H. (2015). WNT3 and membrane-associated  $\beta$ -  
735 catenin regulate trophectoderm lineage differentiation in human blastocysts. *Molecular  
736 Human Reproduction*, 21(9), 711–722. <https://doi.org/10.1093/molehr/gav036>
- 737 Kuijk, E. W., van Tol, L. T. A., van de Velde, H., Wubbolts, R., Welling, M., Geijsen, N., &  
738 Roelen, B. A. J. (2012). The roles of FGF and MAP kinase signaling in the segregation of  
739 the epiblast and hypoblast cell lineages in bovine and human embryos. *Development*,  
740 139(5), 871–882. <https://doi.org/10.1242/dev.071688>
- 741 Kure-bayashi, S., Miyake, M., Okada, K., & Kato, S. (2000). Successful implantation of in vitro-  
742 matured, electro-activated oocytes in the pig. *Theriogenology*, 53(5), 1105–1119.  
743 [https://doi.org/10.1016/S0093-691X\(00\)00256-9](https://doi.org/10.1016/S0093-691X(00)00256-9)
- 744 Lagutina, I., Lazzari, G., Duchi, R., & Galli, C. (2004). Developmental Potential of Bovine  
745 Androgenetic and Parthenogenetic Embryos: A Comparative Study1. *Biology of  
746 Reproduction*, 70(2), 400–405. <https://doi.org/10.1095/biolreprod.103.021972>
- 747 Landry, D. A., Bellefleur, A.-M., Labrecque, R., Grand, F.-X., Vigneault, C., Blondin, P., &  
748 Sirard, M.-A. (2016). Effect of cow age on the in vitro developmental competence of  
749 oocytes obtained after FSH stimulation and coasting treatments. *Theriogenology*, 86(5),  
750 1240–1246. <https://doi.org/10.1016/j.theriogenology.2016.04.064>



- 751 Latham, K. E., Akutsu, H., Patel, B., & Yanagimachi, R. (2002). Comparison of Gene  
752 Expression During Preimplantation Development Between Diploid and Haploid Mouse  
753 Embryos. *Biology of Reproduction*, 67(2), 386–392.  
754 <https://doi.org/10.1095/biolreprod67.2.386>
- 755 Latham, K. E., Doherty, A. S., Scott, C. D., & Schultz, R. M. (1994). Igf2r and Igf2 gene  
756 expression in androgenetic, gynogenetic, and parthenogenetic preimplantation mouse  
757 embryos: absence of regulation by genomic imprinting. *Genes & Development*, 8(3), 290–  
758 299. <https://doi.org/10.1101/gad.8.3.290>
- 759 Leng, L., Sun, J., & Huang, J. (2019). Single-Cell Transcriptome Analysis of Uniparental  
760 Embryos Reveals Parent-of-Origin Effects on Human Preimplantation Development  
761 Resource Single-Cell Transcriptome Analysis of Uniparental Embryos Reveals Parent-of-  
762 Origin Effects on Human Preimplantation Development. *Stem Cell*, 25(5), 697-712.e6.  
763 <https://doi.org/10.1016/j.stem.2019.09.004>
- 764 Leng, L., Sun, J., Huang, J., Gong, F., Yang, L., Zhang, S., Yuan, X., Fang, F., Xu, X., Luo, Y.,  
765 Bolund, L., Peters, B. A., Lu, G., Jiang, T., Xu, F., & Lin, G. (2019). Single-Cell  
766 Transcriptome Analysis of Uniparental Embryos Reveals Parent-of-Origin Effects on  
767 Human Preimplantation Development. *Cell Stem Cell*, 25(5), 697-712.e6.  
768 <https://doi.org/10.1016/j.stem.2019.09.004>
- 769 Lex, A., Gehlenborg, N., Strobel, H., Vuillemot, R., & Pfister, H. (2014). UpSet : Visualization  
770 of Intersecting Sets. *IEEE Transactions on Visualization and Computer Graphics*, 20(12),  
771 1983–1992. <https://doi.org/10.1109/TVCG.2014.2346248>
- 772 Li, Z., Wan, H., Feng, G., Wang, L., He, Z., Wang, Y., Wang, X.-J., Li, W., Zhou, Q., & Hu, B.  
773 (2016). Birth of fertile bimaternal offspring following intracytoplasmic injection of  
774 parthenogenetic haploid embryonic stem cells. *Cell Research*, 26(1), 135–138.  
775 <https://doi.org/10.1038/cr.2015.151>
- 776 Li, Z.-K., Wang, L.-Y., Wang, L.-B., Feng, G.-H., Yuan, X.-W., Liu, C., Xu, K., Li, Y.-H., Wan,  
777 H.-F., Zhang, Y., Li, Y.-F., Li, X., Li, W., Zhou, Q., & Hu, B.-Y. (2018). Generation of  
778 Bimaternal and Bipaternal Mice from Hypomethylated Haploid ESCs with Imprinting  
779 Region Deletions. *Cell Stem Cell*, 23(5), 665-676.e4.  
780 <https://doi.org/10.1016/j.stem.2018.09.004>
- 781 Liao, Y., & Smyth, G. K. (2019). The R package Rsubread is easier , faster , cheaper and better  
782 for alignment and quantification of RNA sequencing reads. *Nucleic Acids Research*, 47(8),  
783 1–9. <https://doi.org/10.1093/nar/gkz114>
- 784 Liao, Y., Smyth, G. K., & Shi, W. (2014). FeatureCounts: An efficient general purpose program  
785 for assigning sequence reads to genomic features. *Bioinformatics*, 30(7), 923–930.  
786 <https://doi.org/10.1093/bioinformatics/btt656>
- 787 Loi, P., Ledda, S., Fulka, J., Cappai, P., & Moor, R. M. (1998). Development of Parthenogenetic  
788 and Cloned Ovine Embryos: Effect of Activation Protocols. *Biology of Reproduction*,  
789 58(5), 1177–1187. <https://doi.org/10.1095/biolreprod58.5.1177>
- 790 Love, M. I., Huber, W., & Anders, S. (2014). *Moderated estimation of fold change and*  
791 *dispersion for RNA-seq data with DESeq2*. 1–21. [https://doi.org/10.1186/s13059-014-0550-](https://doi.org/10.1186/s13059-014-0550-8)  
792 8
- 793 Lu, R., Markowitz, F., Unwin, R. D., Leek, J. T., Airoidi, E. M., MacArthur, B. D., Lachmann,  
794 A., Rozov, R., Ma'ayan, A., Boyer, L. A., Troyanskaya, O. G., Whetton, A. D., &  
795 Lemischka, I. R. (2009). Systems-level dynamic analyses of fate change in murine  
796 embryonic stem cells. *Nature*, 462(7271), 358–362. <https://doi.org/10.1038/nature08575>

- 797 Luo, W., & Brouwer, C. (2013). Pathview : an R / Bioconductor package for pathway-based data  
798 integration and visualization. *Bioinformatics*, 29(14), 1830–1831.  
799 <https://doi.org/10.1093/bioinformatics/btt285>
- 800 Madeja, Z. E., Hryniewicz, K., Orsztynowicz, M., Pawlak, P., & Perkowska, A. (2015). WNT/ $\beta$ -  
801 Catenin Signaling Affects Cell Lineage and Pluripotency-Specific Gene Expression in  
802 Bovine Blastocysts: Prospects for Bovine Embryonic Stem Cell Derivation. *Stem Cells and*  
803 *Development*, 24(20), 2437–2454. <https://doi.org/10.1089/scd.2015.0053>
- 804 Mai, Q., Yu, Y., Li, T., Wang, L., Chen, M., Huang, S., Zhou, C., & Zhou, Q. (2007). Derivation  
805 of human embryonic stem cell lines from parthenogenetic blastocysts. *Cell Research*,  
806 17(12), 1008–1019. <https://doi.org/10.1038/cr.2007.102>
- 807 Martin, M. (2010). Cutadapt removes adapter sequences from high-throughput sequencing reads.  
808 *EMBnet.Journal*, 17(1), 10–12. <https://doi.org/10.14806/ej.17.1.200>
- 809 Masui, S., Nakatake, Y., Toyooka, Y., Shimosato, D., Yagi, R., Takahashi, K., Okochi, H.,  
810 Okuda, A., Matoba, R., Sharov, A. A., Ko, M. S. H., & Niwa, H. (2007). Pluripotency  
811 governed by Sox2 via regulation of Oct3/4 expression in mouse embryonic stem cells.  
812 *Nature Cell Biology*, 9(6), 625–635. <https://doi.org/10.1038/ncb1589>
- 813 Matsukawa, K., Turco, M. Y., Scapolo, P. A., Reynolds, L., Ptak, G., & Loi, P. (2007).  
814 Development of Sheep Androgenetic Embryos Is Boosted following Transfer of Male  
815 Pronuclei into Androgenetic Hemizygotes. *Cloning and Stem Cells*, 9(3), 374–381.  
816 <https://doi.org/10.1089/clo.2006.0016>
- 817 McGrath, J., & Solter, D. (1984). Completion of mouse embryogenesis requires both the  
818 maternal and paternal genomes. *Cell*, 37(1), 179–183. [https://doi.org/10.1016/0092-](https://doi.org/10.1016/0092-8674(84)90313-1)  
819 [8674\(84\)90313-1](https://doi.org/10.1016/0092-8674(84)90313-1)
- 820 Meng, F., Forrester-Gauntlett, B., Turner, P., Henderson, H., & Oback, B. (2015). Signal  
821 Inhibition Reveals JAK/STAT3 Pathway as Critical for Bovine Inner Cell Mass  
822 Development1. *Biology of Reproduction*, 93(6).  
823 <https://doi.org/10.1095/biolreprod.115.134254>
- 824 Mitalipov, S. M., Nusser, K. D., & Wolf, D. P. (2001). Parthenogenetic Activation of Rhesus  
825 Monkey Oocytes and Reconstructed Embryos1. *Biology of Reproduction*, 65(1), 253–259.  
826 <https://doi.org/10.1095/biolreprod65.1.253>
- 827 Mitsui, K., Tokuzawa, Y., Itoh, H., Segawa, K., Murakami, M., Takahashi, K., Maruyama, M.,  
828 Maeda, M., & Yamanaka, S. (2003). The Homeoprotein Nanog Is Required for  
829 Maintenance of Pluripotency in Mouse Epiblast and ES Cells. *Cell*, 113(5), 631–642.  
830 [https://doi.org/10.1016/S0092-8674\(03\)00393-3](https://doi.org/10.1016/S0092-8674(03)00393-3)
- 831 O’Doherty, A. M., MacHugh, D. E., Spillane, C., & Magee, D. A. (2015). Genomic imprinting  
832 effects on complex traits in domesticated animal species. *Frontiers in Genetics*, 6.  
833 <https://doi.org/10.3389/fgene.2015.00156>
- 834 Ogawa, H., Wu, Q., Komiyama, J., Obata, Y., & Kono, T. (2006). Disruption of parental-specific  
835 expression of imprinted genes in uniparental fetuses. *FEBS Letters*, 580(22), 5377–5384.  
836 <https://doi.org/10.1016/j.febslet.2006.08.087>
- 837 Ortega, M. S., Kelleher, A. M., O’Neil, E., Benne, J., Cecil, R., & Spencer, T. E. (2020).  
838 *NANOG* is required to form the epiblast and maintain pluripotency in the bovine embryo.  
839 *Molecular Reproduction and Development*, 87(1), 152–160.  
840 <https://doi.org/10.1002/mrd.23304>
- 841 Ozawa, M., Sakatani, M., Yao, J., Shanker, S., Yu, F., Yamashita, R., Wakabayashi, S., Nakai,  
842 K., Dobbs, K. B., Sudano, M. J., Farmerie, W. G., & Hansen, P. J. (2012). Global gene



- 843 expression of the inner cell mass and trophectoderm of the bovine blastocyst. *BMC*  
844 *Developmental Biology*, 12(1), 33. <https://doi.org/10.1186/1471-213X-12-33>
- 845 Ozil, J. P., & Huneau, D. (2001). Activation of rabbit oocytes: the impact of the Ca<sup>2+</sup> signal  
846 regime on development. *Development*, 128(6), 917–928.  
847 <https://doi.org/10.1242/dev.128.6.917>
- 848 Peng, M., Li, Y., Huang, H., & Jin, F. (2015). The expression of GCN5, HDAC1 and DNMT1 in  
849 parthenogenetically activated mouse embryos. *Journal of Obstetrics and Gynaecology*,  
850 35(2), 131–135. <https://doi.org/10.3109/01443615.2014.942605>
- 851 Pfaffl, M. W., Tichopad, A., Prgomet, C., & Neuvians, T. P. (2004). Determination of stable  
852 housekeeping genes, differentially regulated target genes and sample integrity: BestKeeper  
853 – Excel-based tool using pair-wise correlations. *Biotechnology Letters*, 26(6), 509–515.  
854 <https://doi.org/10.1023/B:BILE.0000019559.84305.47>
- 855 Reverter, A., & Chan, E. K. F. (2008). *Combining partial correlation and an information theory*  
856 *approach to the reversed engineering of gene co-expression networks*. 24(21), 2491–2497.  
857 <https://doi.org/10.1093/bioinformatics/btn482>
- 858 Reverter, A., Hudson, N. J., Nagaraj, S. H., Pérez-Enciso, M., & Dalrymple, B. P. (2010).  
859 Regulatory impact factors: Unraveling the transcriptional regulation of complex traits from  
860 expression data. *Bioinformatics*, 26(7), 896–904.  
861 <https://doi.org/10.1093/bioinformatics/btq051>
- 862 Robinson, M. D., McCarthy, D. J., & Smyth, G. K. (2010). edgeR : a Bioconductor package for  
863 differential expression analysis of digital gene expression data. *Bioinformatics*, 26(1), 139–  
864 140. <https://doi.org/10.1093/bioinformatics/btp616>
- 865 Rodríguez-Alvarez, L., Cox, J., Tovar, H., Einspanier, R., & Castro, F. O. (2010). Changes in the  
866 expression of pluripotency-associated genes during preimplantation and peri-implantation  
867 stages in bovine cloned and *in vitro* produced embryos. *Zygote*, 18(3), 269–279.  
868 <https://doi.org/10.1017/S0967199409990323>
- 869 Rodríguez-Alvarez, L., Manriquez, J., Velasquez, A., & Castro, F. O. (2013). Constitutive  
870 expression of the embryonic stem cell marker OCT4 in bovine somatic donor cells  
871 influences blastocysts rate and quality after nucleus transfer. *In Vitro Cellular &*  
872 *Developmental Biology - Animal*, 49(9), 657–667. [https://doi.org/10.1007/s11626-013-](https://doi.org/10.1007/s11626-013-9650-0)  
873 [9650-0](https://doi.org/10.1007/s11626-013-9650-0)
- 874 Sagi, I., de Pinho, J. C., Zuccaro, M. v., Atzmon, C., Golan-Lev, T., Yanuka, O., Prosser, R.,  
875 Sadowy, A., Perez, G., Cabral, T., Glaser, B., Tsang, S. H., Goland, R., Sauer, M. v., Lobo,  
876 R., Benvenisty, N., & Egli, D. (2019). Distinct Imprinting Signatures and Biased  
877 Differentiation of Human Androgenetic and Parthenogenetic Embryonic Stem Cells. *Cell*  
878 *Stem Cell*, 25(3), 419–432.e9. <https://doi.org/10.1016/j.stem.2019.06.013>
- 879 Sakurai, N., Takahashi, K., Emura, N., Fujii, T., Hirayama, H., Kageyama, S., Hashizume, T., &  
880 Sawai, K. (2016). The Necessity of OCT-4 and CDX2 for Early Development and Gene  
881 Expression Involved in Differentiation of Inner Cell Mass and Trophectoderm Lineages in  
882 Bovine Embryos. *Cellular Reprogramming*, 18(5), 309–318.  
883 <https://doi.org/10.1089/cell.2015.0081>
- 884 Sampaio, R. V., Sangalli, J. R., de Bem, T. H. C., Ambrizi, D. R., del Collado, M., Bridi, A., de  
885 Ávila, A. C. F. C. M., Macabelli, C. H., de Jesus Oliveira, L., da Silveira, J. C., Chiaratti,  
886 M. R., Perecin, F., Bressan, F. F., Smith, L. C., Ross, P. J., & Meirelles, F. V. (2020).  
887 Catalytic inhibition of H3K9me2 writers disturbs epigenetic marks during bovine nuclear

- 888 reprogramming. *Scientific Reports*, *10*(1), 11493. [https://doi.org/10.1038/s41598-020-](https://doi.org/10.1038/s41598-020-67733-9)  
889 [67733-9](https://doi.org/10.1038/s41598-020-67733-9)
- 890 Schwanhäusser, B., Busse, D., Li, N., Dittmar, G., Schuchhardt, J., Wolf, J., Chen, W., &  
891 Selbach, M. (2013). Correction: Corrigendum: Global quantification of mammalian gene  
892 expression control. *Nature*, *495*(7439), 126–127. <https://doi.org/10.1038/nature11848>
- 893 Soto, D. A., Navarro, M., Zheng, C., Halstead, M. M., Zhou, C., Gultinan, C., Wu, J., & Ross,  
894 P. J. (2021). Simplification of culture conditions and feeder-free expansion of bovine  
895 embryonic stem cells. *Scientific Reports*, *11*(1), 11045. [https://doi.org/10.1038/s41598-021-](https://doi.org/10.1038/s41598-021-90422-0)  
896 [90422-0](https://doi.org/10.1038/s41598-021-90422-0)
- 897 Sotomaru, Y., Kawase, Y., Ueda, T., Obata, Y., Suzuki, H., Domeki, I., Hatada, I., & Kono, T.  
898 (2001). Disruption of Imprinted Expression of U2afbp-rs/U2af1-rs1 Gene in Mouse  
899 Parthenogenetic Fetuses. *Journal of Biological Chemistry*, *276*(28), 26694–26698.  
900 <https://doi.org/10.1074/jbc.M101367200>
- 901 Sritanaudomchai, H., Ma, H., Clepper, L., Gokhale, S., Bogan, R., Hennebold, J., Wolf, D., &  
902 Mitalipov, S. (2010). Discovery of a novel imprinted gene by transcriptional analysis of  
903 parthenogenetic embryonic stem cells. *Human Reproduction*, *25*(8), 1927–1941.  
904 <https://doi.org/10.1093/humrep/deq144>
- 905 Stelzer, Y., Bar, S., Bartok, O., Afik, S., Ronen, D., Kadener, S., & Benvenisty, N. (2015).  
906 Differentiation of Human Parthenogenetic Pluripotent Stem Cells Reveals Multiple Tissue-  
907 and Isoform-Specific Imprinted Transcripts. *Cell Reports*, *11*(2), 308–320.  
908 <https://doi.org/10.1016/j.celrep.2015.03.023>
- 909 Surani, M. A. H., Barton, S. C., & Norris, M. L. (1984). Development of reconstituted mouse  
910 eggs suggests imprinting of the genome during gametogenesis. *Nature*, *308*(5959), 548–  
911 550. <https://doi.org/10.1038/308548a0>
- 912 Surani, M. A. H., Barton, S. C., & Norris, M. L. (1986). Nuclear transplantation in the mouse:  
913 Heritable differences between parental genomes after activation of the embryonic genome.  
914 *Cell*, *45*(1), 127–136. [https://doi.org/10.1016/0092-8674\(86\)90544-1](https://doi.org/10.1016/0092-8674(86)90544-1)
- 915 Thomson, J. A., & Solter, D. (1988). The developmental fate of androgenetic, parthenogenetic,  
916 and gynogenetic cells in chimeric gastrulating mouse embryos. *Genes & Development*,  
917 *2*(10), 1344–1351. <https://doi.org/10.1101/gad.2.10.1344>
- 918 Tian, Q., Stepaniants, S. B., Mao, M., Weng, L., Feetham, M. C., Doyle, M. J., Yi, E. C., Dai,  
919 H., Thorsson, V., Eng, J., Goodlett, D., Berger, J. P., Gunter, B., Linseley, P. S., Stoughton,  
920 R. B., Aebersold, R., Collins, S. J., Hanlon, W. A., & Hood, L. E. (2004). Integrated  
921 Genomic and Proteomic Analyses of Gene Expression in Mammalian Cells. *Molecular &*  
922 *Cellular Proteomics*, *3*(10), 960–969. <https://doi.org/10.1074/mcp.M400055-MCP200>
- 923 Tremble, K. C., Stirparo, G. G., Bates, L. E., Maskalenka, K., Stuart, H. T., Jones, K.,  
924 Andersson-Rolf, A., Radziskeuskaya, A., Koo, B.-K., Bertone, P., & Silva, J. C. R. (2021).  
925 Sox2 modulation increases naïve pluripotency plasticity. *iScience*, *24*(3), 102153.  
926 <https://doi.org/10.1016/j.isci.2021.102153>
- 927 Tribulo, P., Leão, B. C. da S., Lehloeny, K. C., Mingoti, G. Z., & Hansen, P. J. (2017).  
928 Consequences of endogenous and exogenous WNT signaling for development of the  
929 preimplantation bovine embryo†. *Biology of Reproduction*, *96*(6), 1129–1141.  
930 <https://doi.org/10.1093/biolre/iox048>
- 931 Valencia, C., Pérez, F. A., Matus, C., Felmer, R., & Arias, M. E. (2021). Activation of bovine  
932 oocytes by protein synthesis inhibitors: new findings on the role of MPF/MAPKs†. *Biology*  
933 *of Reproduction*, *104*(5), 1126–1138. <https://doi.org/10.1093/biolre/ioab019>

- 934 Velásquez, A. E., Veraguas, D., Cabezas, J., Manríquez, J., Castro, F. O., & Rodríguez-Alvarez,  
935 L. L. (2019). The expression level of *SOX2* at the blastocyst stage regulates the  
936 developmental capacity of bovine embryos up to day-13 of *in vitro* culture. *Zygote*, 27(6),  
937 398–404. <https://doi.org/10.1017/S0967199419000509>
- 938 Vichera, G., Olivera, R., Sipowicz, P., Radrizzani, M., & Salamone, D. (2011). Sperm genome  
939 cloning used in biparental bovine embryo reconstruction. *Reproduction, Fertility and*  
940 *Development*, 23(6), 769. <https://doi.org/10.1071/RD10252>
- 941 Wang, C., Han, X., Zhou, Z., Uyunbilig, B., Huang, X., Li, R., & Li, X. (2019). Wnt3a Activates  
942 the WNT-YAP/TAZ Pathway to Sustain *CDX2* Expression in Bovine Trophoblast Stem  
943 Cells. *DNA and Cell Biology*, 38(5), 410–422. <https://doi.org/10.1089/dna.2018.4458>
- 944 Wang, L., & Li, J. (2019). ‘Artificial spermatid’-mediated genome editing†. *Biology of*  
945 *Reproduction*, 101(3), 538–548. <https://doi.org/10.1093/biolre/iox087>
- 946 Wang, S., Liu, B., Liu, W., Xiao, Y., Zhang, H., & Yang, L. (2017). The effects of melatonin on  
947 bovine uniparental embryos development *in vitro* and the hormone secretion of COCs.  
948 *PeerJ*, 5, e3485. <https://doi.org/10.7717/peerj.3485>
- 949 Wang, Z., Wang, W., Yu, S., & Xu, Z. (2008). Effects of different activation protocols on  
950 preimplantation development, apoptosis and ploidy of bovine parthenogenetic embryos.  
951 *Animal Reproduction Science*, 105(3–4), 292–301.  
952 <https://doi.org/10.1016/j.anireprosci.2007.03.017>
- 953 Warzych, E., Pawlak, P., Lechniak, D., & Madeja, Z. E. (2020). WNT signalling supported by  
954 MEK/ERK inhibition is essential to maintain pluripotency in bovine preimplantation  
955 embryo. *Developmental Biology*, 463(1), 63–76.  
956 <https://doi.org/10.1016/j.ydbio.2020.04.004>
- 957 Wei, Y., Yang, C.-R., & Zhao, Z.-A. (2022). Viable offspring derived from single unfertilized  
958 mammalian oocytes. *Proceedings of the National Academy of Sciences*, 119(12).  
959 <https://doi.org/10.1073/pnas.2115248119>
- 960 Wickham, H. (2009). ggplot2 by Hadley Wickham. *Media*, 35(July), 211.  
961 <https://doi.org/10.1007/978-0-387-98141-3>
- 962 Xiao, Y., Amaral, T. F., Ross, P. J., Soto, D. A., Diffenderfer, K. E., Pankonin, A. R., Jeensuk,  
963 S., Tribulo, P., & Hansen, P. J. (2021). Importance of WNT-dependent signaling for  
964 derivation and maintenance of primed pluripotent bovine embryonic stem cells. *Biology of*  
965 *Reproduction*, 105(1), 52–63. <https://doi.org/10.1093/biolre/ioab075>
- 966 Xiao, Y., Sosa, F., Ross, P. J., Diffenderfer, K. E., & Hansen, P. J. (2021). Regulation of  
967 NANOG and SOX2 expression by activin A and a canonical WNT agonist in bovine  
968 embryonic stem cells and blastocysts. *Biology Open*, 10(11).  
969 <https://doi.org/10.1242/bio.058669>
- 970 Xiao, Y., Zhang, H., Ahmad, S., Bai, L., Wang, X., Huo, L., Zhang, X., Li, W., Li, X., & Yang,  
971 L. (2013). Sperm capacitation combined with removal of the sperm acrosome and plasma  
972 membrane enhances paternal nucleus remodelling and early development of bovine  
973 androgenetic embryos. *Reproduction, Fertility and Development*, 25(4), 624.  
974 <https://doi.org/10.1071/RD12075>
- 975 Yu, G., Wang, L.-G., Han, Y., & He, Q.-Y. (2012). clusterProfiler: an R Package for Comparing  
976 Biological Themes Among Gene Clusters. *OMICS: A Journal of Integrative Biology*, 16(5),  
977 284–287. <https://doi.org/10.1089/omi.2011.0118>
- 978 Zhang, H., Xiao, Y., Wang, X., Riaz, H., Li, W., Fu, S., Xin, Y., Shi, L., Ma, F., Li, X., & Yang,  
979 L. (2014). Effects of Histone Deacetylase Inhibitors on the Early Development of Bovine

980 Androgenetic Embryos. *Cellular Reprogramming*, 16(1), 54–64.  
981 <https://doi.org/10.1089/cell.2013.0027>  
982 Zhang, P., Andrianakos, R., Yang, Y., Liu, C., & Lu, W. (2010). Kruppel-like Factor 4 (Klf4)  
983 Prevents Embryonic Stem (ES) Cell Differentiation by Regulating Nanog Gene Expression.  
984 *Journal of Biological Chemistry*, 285(12), 9180–9189.  
985 <https://doi.org/10.1074/jbc.M109.077958>

986  
987  
988

## 989 **FIGURE LEGENDS**

990

991 Figure 1. The uniparental haploid genome influences transcriptomic profile at the morula stage.  
992 A, Principal component analysis (PCA) plot based on transcriptomic differences among haploid  
993 androgenetic (hAE; green dots), haploid parthenogenetic (hPE; red dots) and biparental (ICSI; blue  
994 dots) embryos. B-D, Smear plot depicting differences on expression between (B), haploid  
995 androgenetic (hAE; green dots) and biparental biparental (ICSI; blue dots) embryos, (C), haploid  
996 parthenogenetic (hPE; red dots) and biparental (ICSI; blue dots) embryos, and (D), haploid  
997 androgenetic (hAE; green dots) and haploid parthenogenetic (hPE; red dots) embryos; dots in grey  
998 are not differentially expressed based in the filterByExpr function from edgeR package. E, Bar  
999 chart illustrating the most represented transcripts by each group of embryos and intersection size  
1000 between transcriptomes. F-I, Heatmap illustration showing top fifty differentially expressed genes  
1001 among haploid and biparental embryos. J, Gene ontology enrichment analysis of the 1194 more  
1002 expressed genes in transcriptomic from haploid androgenetic (hAE; green dots), haploid  
1003 parthenogenetic (hPE; red dots) and biparental (ICSI; blue dots) embryos. The red and blue  
1004 represent enrichment (absolute value of log<sub>2</sub> foldchange greater than 0.5) for up- and  
1005 downregulated DEGs, respectively.

1006

1007 Figure 2. Haploid androgenetic embryos exhibit differential levels of pluripotency factors at the  
1008 morula stage.

1009 A-C, Principal component analysis (PCA) plot based on transcriptomic profiles of pluripotency-  
1010 related factors between (A), haploid androgenetic (hAE; green dots) and biparental (ICSI; blue  
1011 dots) embryos, (B), haploid parthenogenetic (hPE; red dots) and haploid androgenetic (hAE; green  
1012 dots) embryos, and (D), haploid parthenogenetic (hPE; red dots) and biparental (ICSI; blue dots)  
1013 embryos. D, Heatmap showing the expression levels of factors associated with pathways  
1014 regulating pluripotency of stem cells. Using hierarchical clustering, genes are segregated into two  
1015 groups, where haploid parthenogenetic (hPE) samples grouped with biparental (ICSI) embryos,  
1016 distinctly than haploid androgenetic (hAE) counterparts. E-G, differential expression levels of  
1017 signaling factors regulating pluripotency networks between biparental (ICSI) and haploid  
1018 androgenetic (hAE) embryos (E), haploid parthenogenetic (hPE) and haploid androgenetic (hAE)  
1019 embryos (F), and biparental (ICSI) and haploid parthenogenetic (hPE) embryos (F).

1020

1021 Figure 3. Haploid androgenetic embryos display differential expression of WNT signaling factors  
1022 at the morula stage.

1023 A-C, Principal component analysis (PCA) plot based on transcriptomic profiles of WNT-signaling  
1024 factors between (A), haploid androgenetic (green dots) and biparental ICSI (blue dots) embryos,  
1025 (B), haploid parthenogenetic (red dots) and haploid androgenetic (green dots) embryos, and (C),



1026 haploid parthenogenetic (red dots) and biparental ICSI (blue dots) embryos. D, Heatmap showing  
1027 the relative expression levels of factors regulating WNT-signaling. Using hierarchical clustering,  
1028 genes are segregated into two groups, where haploid parthenogenetic (hPE) samples grouped with  
1029 biparental (ICSI) embryos, distinctly than haploid androgenetic (hAE) counterparts. E-G,  
1030 differential expression levels of signaling factors regulating WNT network pathway between  
1031 biparental (ICSI) and haploid androgenetic (hAE) embryos (E), haploid parthenogenetic (hPE) and  
1032 haploid androgenetic (hAE) embryos (F), and biparental (ICSI) and haploid parthenogenetic (hPE)  
1033 embryos (F). H, Venn diagram illustrating relationship between pluripotency, WNT signalling and  
1034 hub genes of bovine haploid androgenetic morula-stage embryos.

1035

1036 Figure 4. The transcriptomic profile of human uniparental diploid morula-stage embryos behaves  
1037 differentially regarding to bovine species but share global imprinted patterns.

1038 B-C, Heatmap illustration showing global transcriptomic profiles of homologous genes from (B)  
1039 human diploid parthenogenetic (dPE), diploid androgenetic (dAE) and biparental (ICSI) embryos,  
1040 and (C) bovine haploid parthenogenetic (hPE), haploid androgenetic (hAE) and biparental (ICSI)  
1041 embryos. D-E, Heatmap illustration showing imprinted transcriptomic profiles of (D) human  
1042 diploid parthenogenetic (dPE), diploid androgenetic (dAE) and biparental (ICSI) embryos, and (E)  
1043 bovine haploid parthenogenetic (hPE), haploid androgenetic (hAE) and biparental (ICSI) embryos.  
1044 F-G, signaling factors regulating pluripotency networks between human diploid parthenogenetic  
1045 (dPE) and diploid androgenetic (dAE) embryos (F), and between biparental (ICSI) and diploid  
1046 androgenetic (dAE) (G).

1047

1048 Figure 5. Relative transcript levels of genes associated with pluripotency from biparental (salmon  
1049 square), haploid parthenogenetic (green square), and haploid androgenetic (light-blue square) at  
1050 the morula-stage. A, Light-blue boxes: morulas at day 6 post fertilization; B, coral boxes:  
1051 “arrested” morulas at day 7 post fertilization. Axis inhibition protein 2 (*AXIN2*); Beta-catenin-like  
1052 protein 1 (*CTNBL1*); caudal type homeobox 2 (*CDX2*); Glycogen synthase kinase-3 beta  
1053 (*GSK3B*); kruppel-like factor 4 (*KFL4*); homeobox protein NANOG (*NANOG*); POU domain,  
1054 class 5, transcription factor 1 (*POU5F1*); sex determining region Y-box 2 (*SOX2*); yes-associated  
1055 protein 1 (*YAP*). (\* $p < 0.05$ , \*\* $p < 0.01$ , \*\*\* $p < 0.001$ ).

1056

1057 Figure 6. Blastocyst morphology at 192 h of *in vitro* culture. A, percentages of biparental  
1058 (ICSI+DMSO and ICSI+Chir99), haploid parthenogenetic (hPE+DMSO and hPE+Chir99) and  
1059 haploid androgenetic (hAE+DMSO and hAE+Chir99) development cultured in the absence  
1060 (DMSO vehicle) or presence of CHIR99021. B, representative images of a) biparental (ICSI), b)  
1061 haploid parthenogenetic (hPE), c) haploid androgenetic+DMSO (hAE+DMSO), and d) haploid  
1062 androgenetic + CHIR99021 (hAE+Chir99) embryos at Day-8 (192 h) of culture. ICSI,  
1063 intracytoplasmic sperm injection; hPE, haploid parthenogenetic embryo; hAE, haploid  
1064 androgenetic embryo. Red arrowheads indicate early blastocyst stage. Blue arrowheads indicate  
1065 expanded/expanding blastocyst stage.

1066 Figure 7. Relative levels of transcripts associated with pluripotency from blastocyst stage embryos  
1067 (day 8) obtained by *in vitro* fertilization (IVF), intracytoplasmic sperm injection (ICSI), haploid  
1068 parthenogenetic activation (hPE) or haploid androgenetic (hAE) development, cultured in absence  
1069 (DMSO) or presence of Chir99021 (Chir99). Salmon squares: IVF; mustard squares:  
1070 ICSI+DMSO, ICSI embryos cultured in presence of 0.001% DMSO; olive-green squares:  
1071 ICSI+Chir99, ICSI embryos cultured in presence of Chir99; teal squares: hPE + DMSO, haploid

1072 parthenogenetic embryos cultured in presence of 0.001% DMSO; light-blue squares: hPE +  
 1073 Chir99, haploid parthenogenetic embryos cultured in presence of Chir99; purple squares: hAE +  
 1074 DMSO, haploid androgenetic embryos cultured in presence of 0.001% DMSO; magenta squares:  
 1075 hAE + Chir99, haploid androgenetic embryos cultured in presence of Chir99021. Axis inhibition  
 1076 protein 2 (*AXIN2*); Beta-catenin-like protein 1 (*CTNNB1*); caudal type homeobox 2 (*CDX2*);  
 1077 Glycogen synthase kinase-3 beta (*GSK3B*); kruppel-like factor 4 (*KLF4*); homeobox protein  
 1078 NANOG (*NANOG*); POU domain, class 5, transcription factor 1 (*POU5F1*); sex determining  
 1079 region Y-box 2 (*SOX2*); yes-associated protein 1 (*YAP*). (\*p < 0.05, \*\*p < 0.01, \*\*\*p < 0.001).

1080  
 1081 Figure 8. Cell number and allocation of biparental and haploid blastocyst stage embryos.  
 1082 A, Nuclear counts of blastocyst stage embryos harvested at day-8 of culture. B, Representative  
 1083 fluorescent images of blastocyst harvested at day-8 or day-10 of culture. ICSI, intracytoplasmic  
 1084 sperm injection; hPE, haploid parthenogenetic embryo; hAE + DMSO, haploid androgenetic  
 1085 embryos cultured in presence of 0.001% DMSO; hAE + Chir99, haploid androgenetic embryos  
 1086 cultured in presence of Chir99021.

1087  
 1088 **TABLES**

1089  
 1090 Table 1. *In vitro* development of biparental, haploid parthenogenetic and haploid androgenetic  
 1091 embryos cultured in the presence of the *GSK3B* inhibitor *CHIR99021* or without inhibitor  
 1092 (*DMSO*).

| Group                    | Oocytes    | (n)         | Cleaved embryos (%) | Morulas (%)                  | Blastocyst (%)              | Blastocyst/morulas (%)    |
|--------------------------|------------|-------------|---------------------|------------------------------|-----------------------------|---------------------------|
| <b>Biparental (ICSI)</b> | <b>450</b> | <b>(15)</b> | <b>270 (60%)</b>    | <b>106 (24%)<sup>a</sup></b> | <b>84 (19%)<sup>a</sup></b> | <b>(79%)<sup>a</sup></b>  |
| + DMSO                   |            |             |                     | 82 n.a                       | 64 n.a                      | (78%) <sup>a</sup>        |
| + Chir99021              |            |             |                     | 24 n.a                       | 20 n.a                      | (83%) <sup>a</sup>        |
| <b>hPE</b>               | <b>672</b> | <b>(17)</b> | <b>420 (63%)</b>    | <b>114 (17%)<sup>b</sup></b> | <b>86 (12%)<sup>b</sup></b> | <b>(75%)<sup>a</sup></b>  |
| + DMSO                   |            |             |                     | 83 n.a                       | 62 n.a                      | (75%) <sup>a</sup>        |
| + Chir99021              |            |             |                     | 31 n.a                       | 24 n.a                      | (77%) <sup>a</sup>        |
| <b>hAE</b>               | <b>888</b> | <b>(20)</b> | <b>603 (68%)</b>    | <b>79 (9%)<sup>c</sup></b>   | <b>42 (5%)<sup>c</sup></b>  | <b>(53%)<sup>ab</sup></b> |
| + DMSO                   |            |             |                     | 42 n.a                       | 13 n.a                      | (31%) <sup>b</sup>        |
| + Chir99021              |            |             |                     | 37 n.a                       | 29 n.a                      | (78%) <sup>a</sup>        |

1093  
 1094 Development to cleavage and blastocyst stages at Day-2 (48 h) and Day-8 (192 h) post fertilization,  
 1095 respectively. ICSI, intracytoplasmic sperm injection. hPE, haploid parthenogenetic embryo  
 1096 obtained by oocyte activation using ionomycin followed by cycloheximide. hAE, haploid  
 1097 androgenetic embryos were obtained by ICSI followed by TII enucleation. n.a.: cleaving and  
 1098 morula's rates were not included because DMSO and CHIR99021 treatment initiated at day 5 of  
 1099 culture.

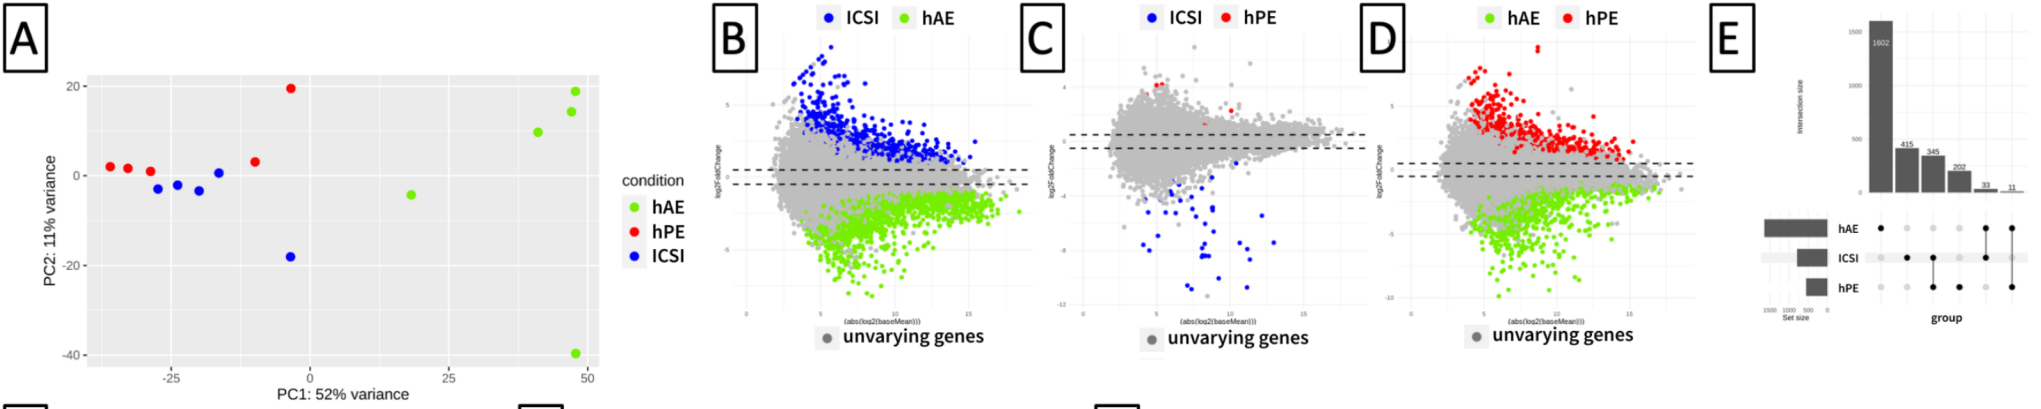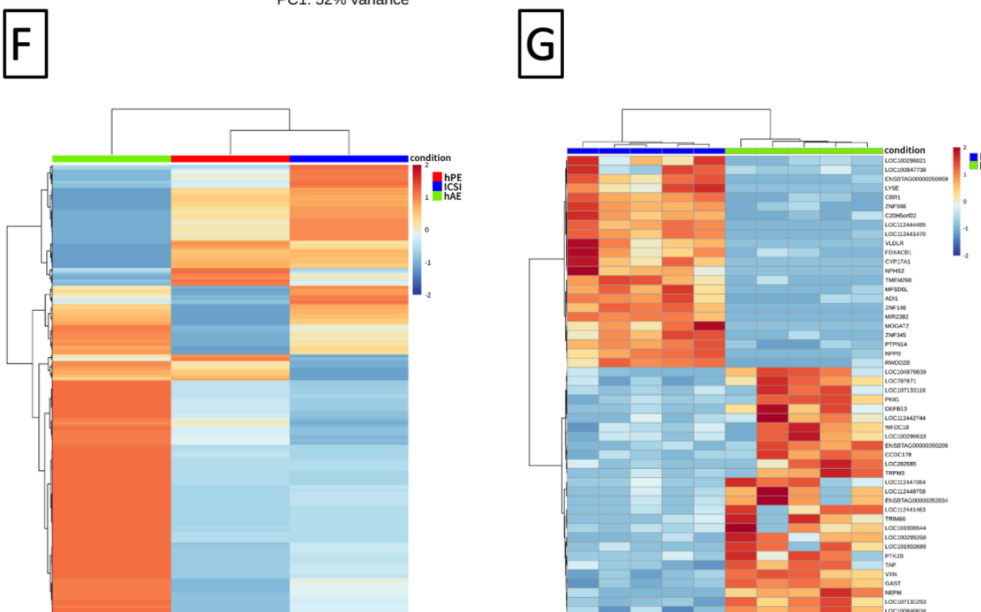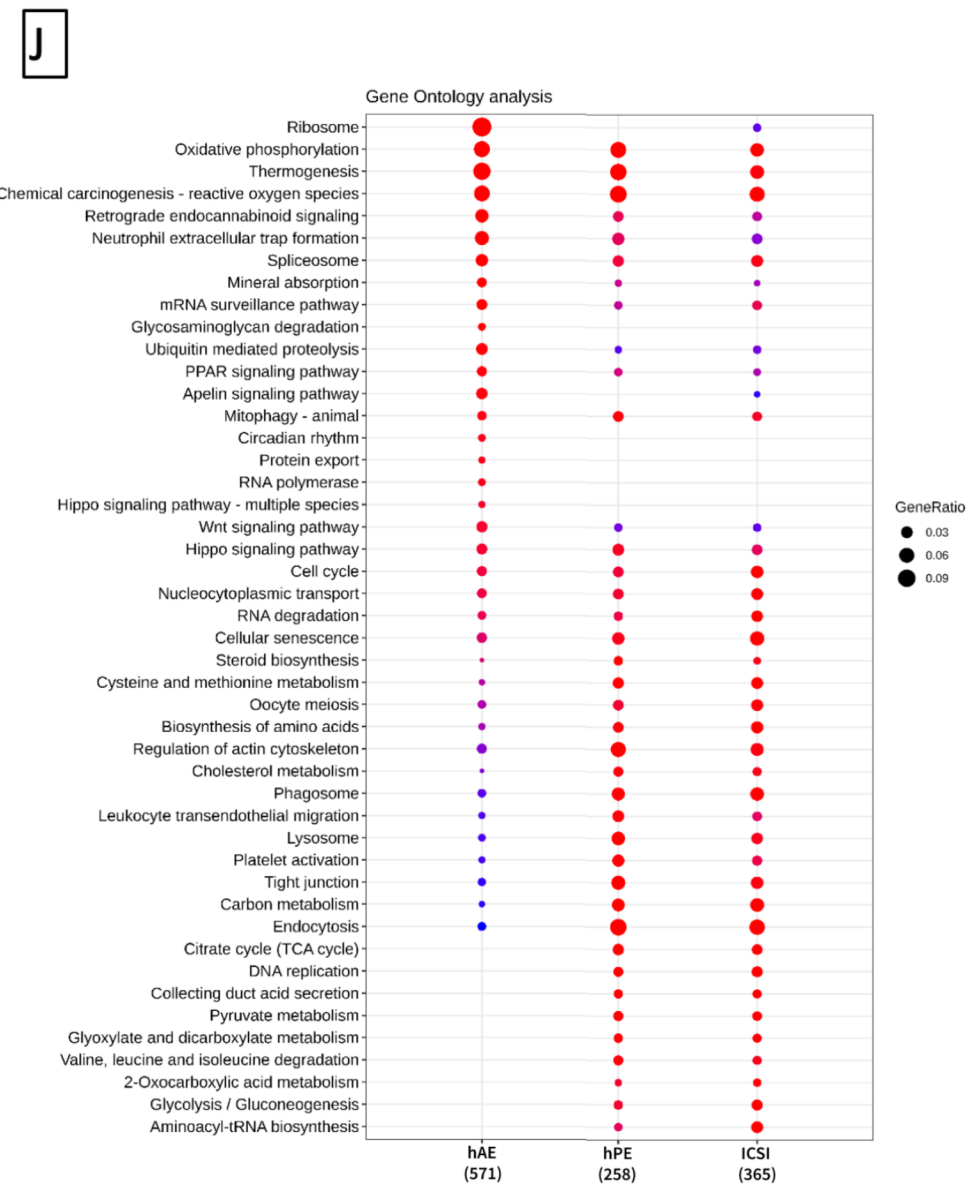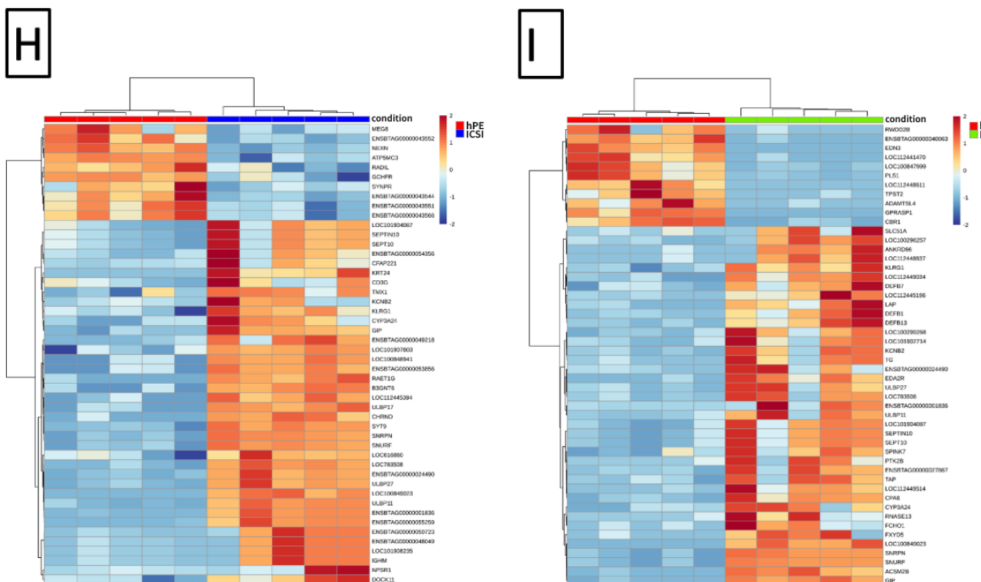



**A**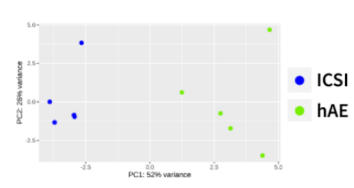**B**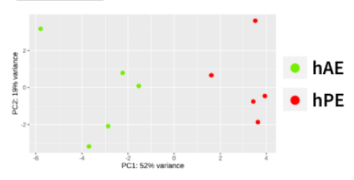**C**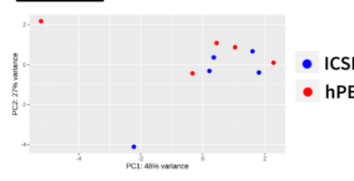**D**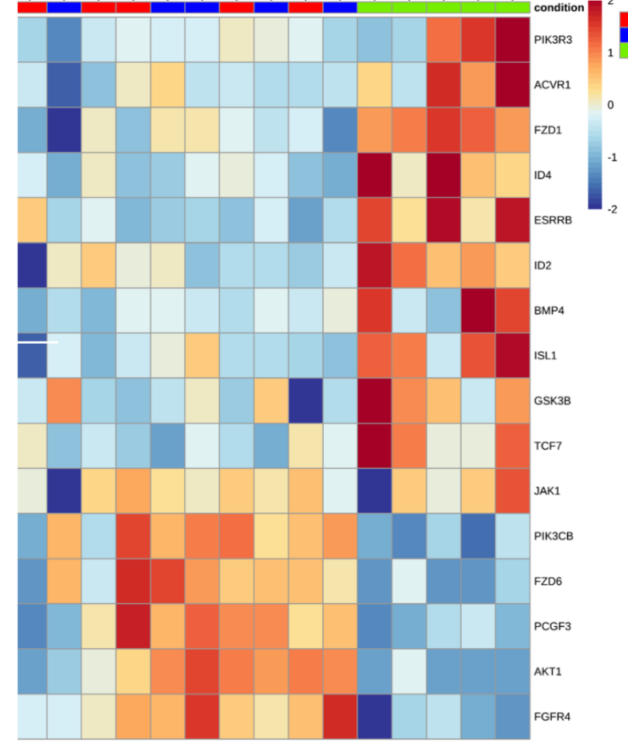**E- ICSI vs hAE**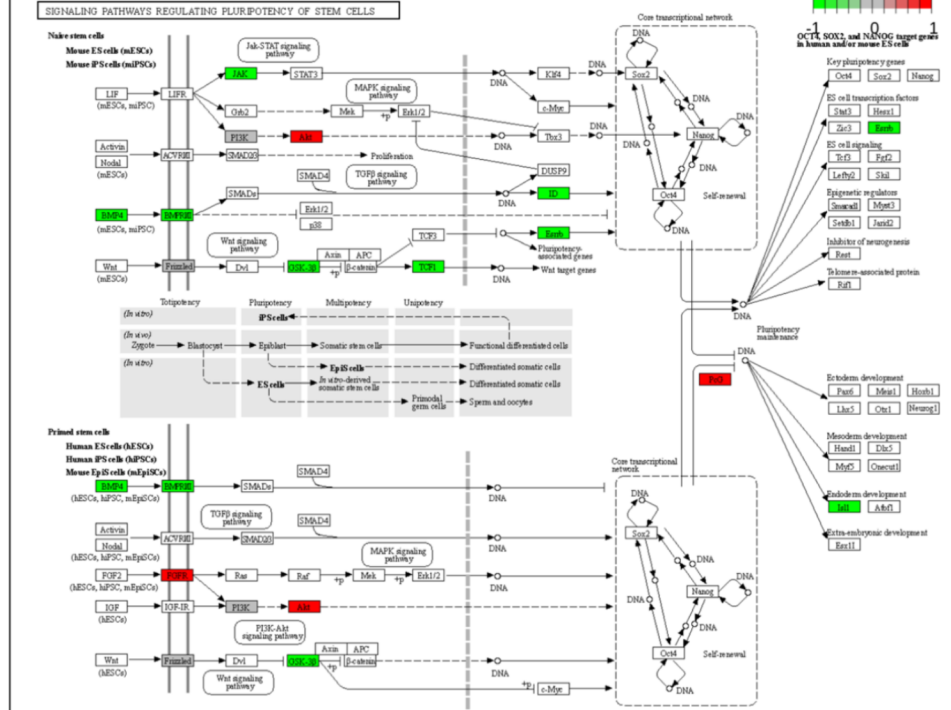**F- hPE vs hAE**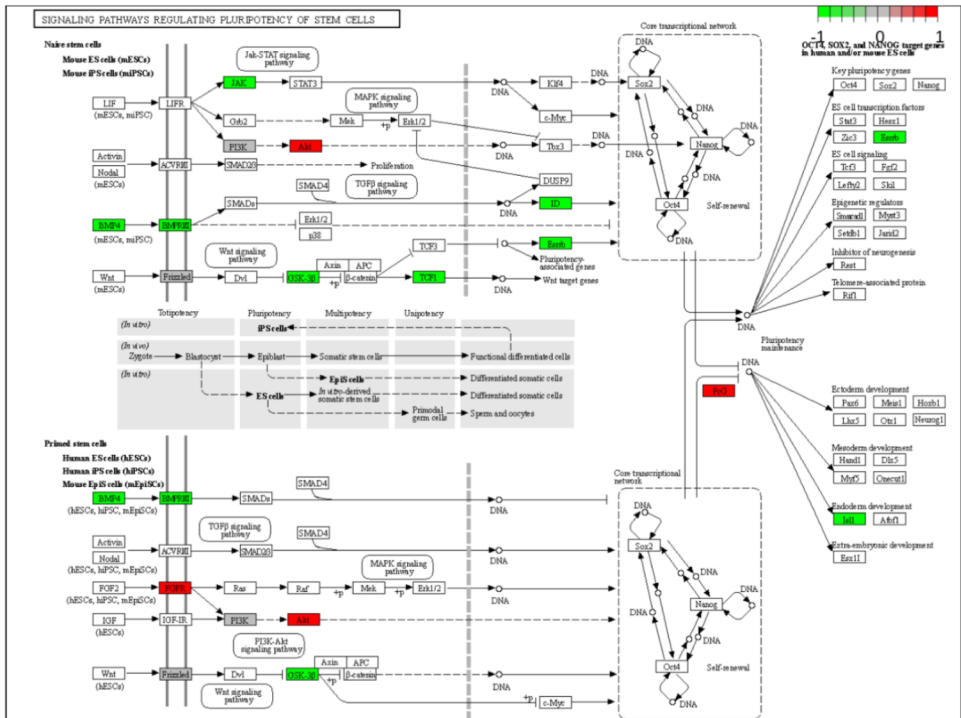**G- ICSI vs hPE**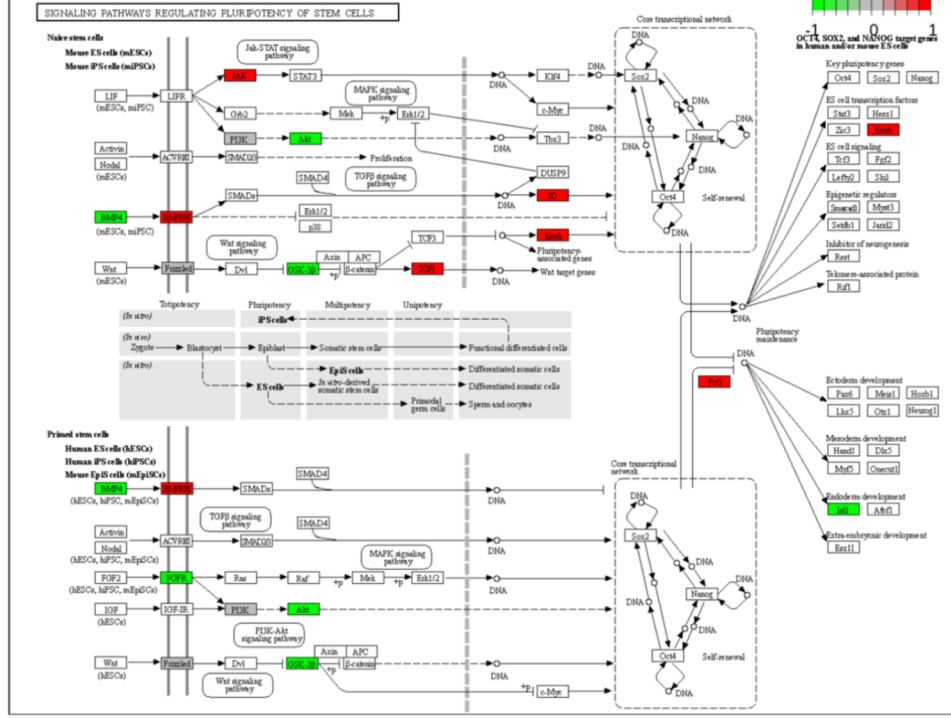

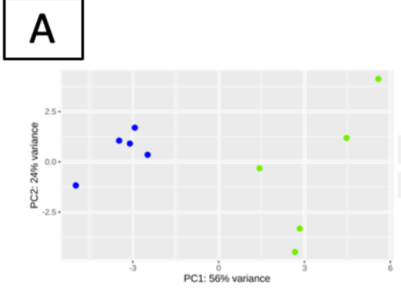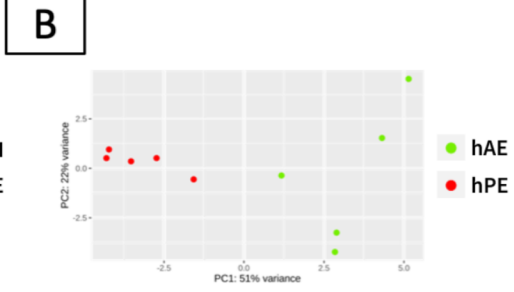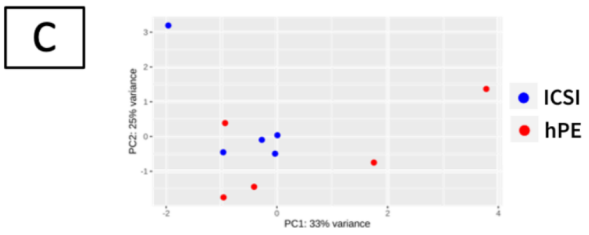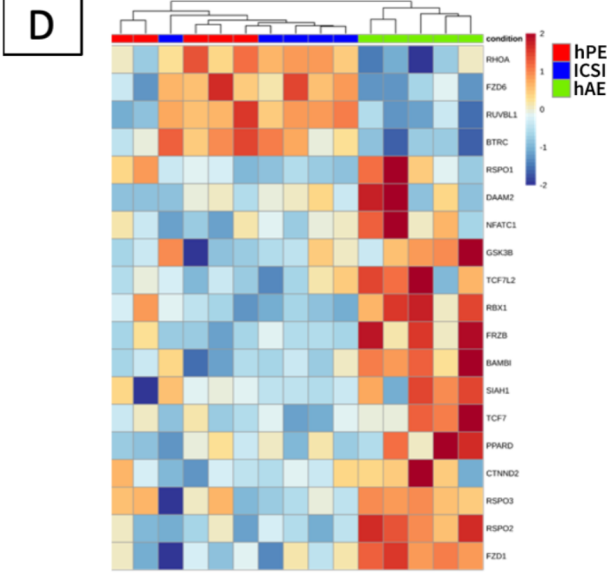

## E- ICSI vs hAE

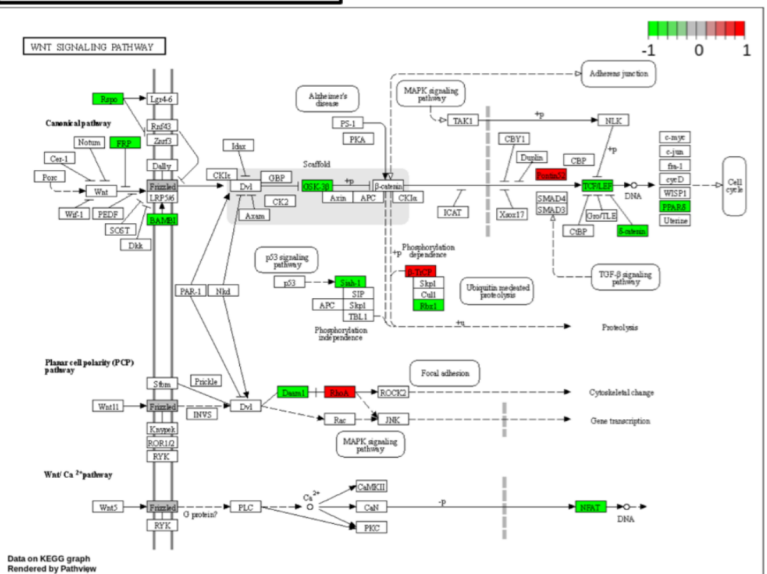

## F- hPE vs hAE

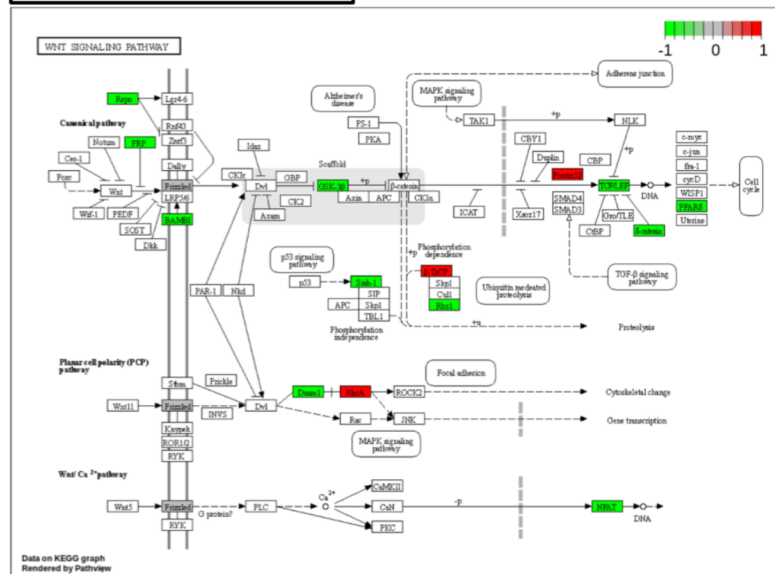

## G- ICSI vs hPE

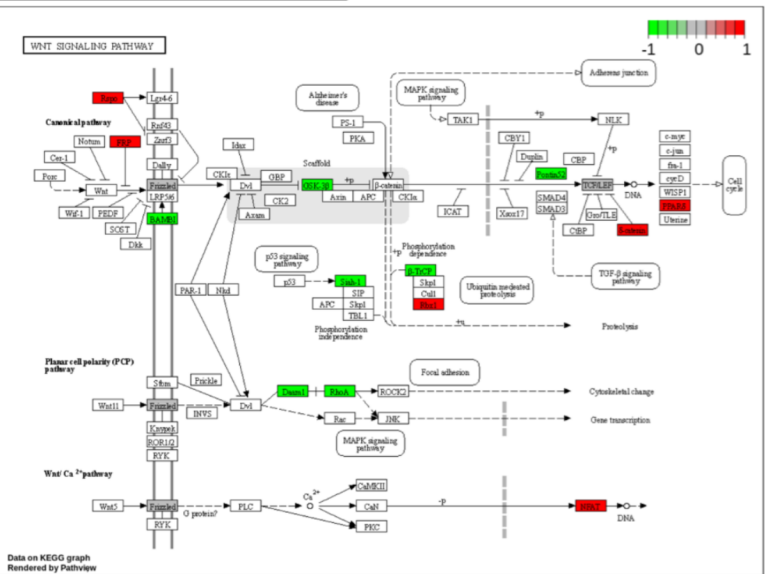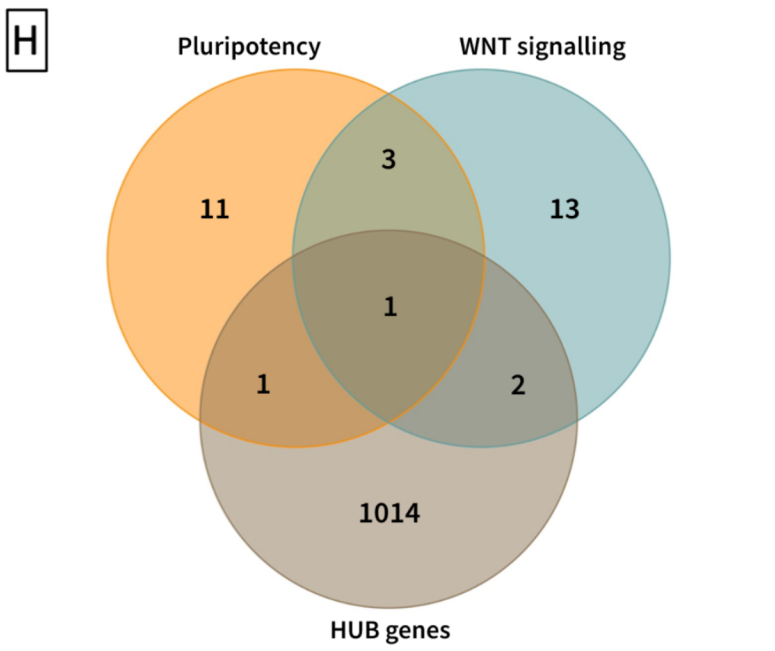

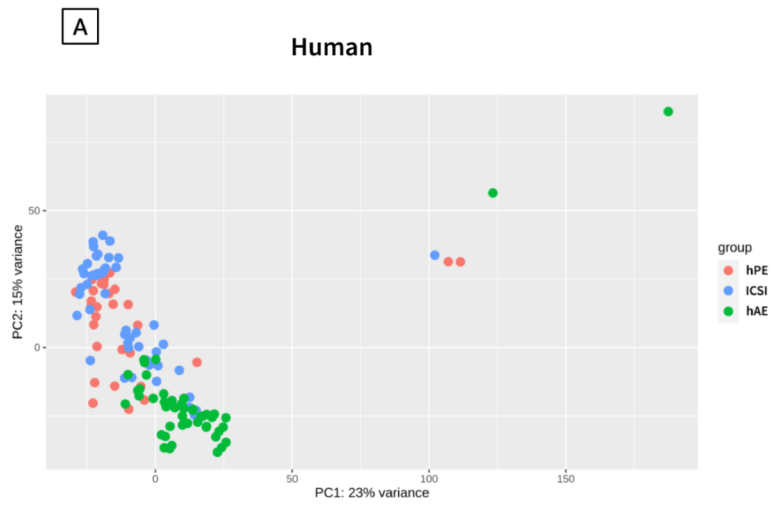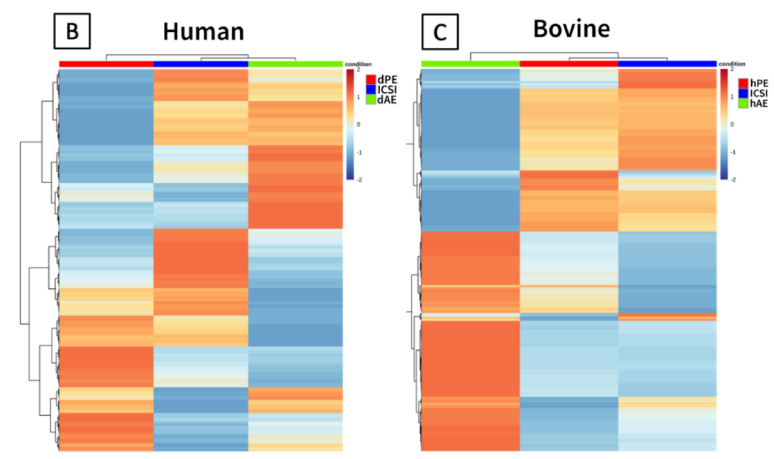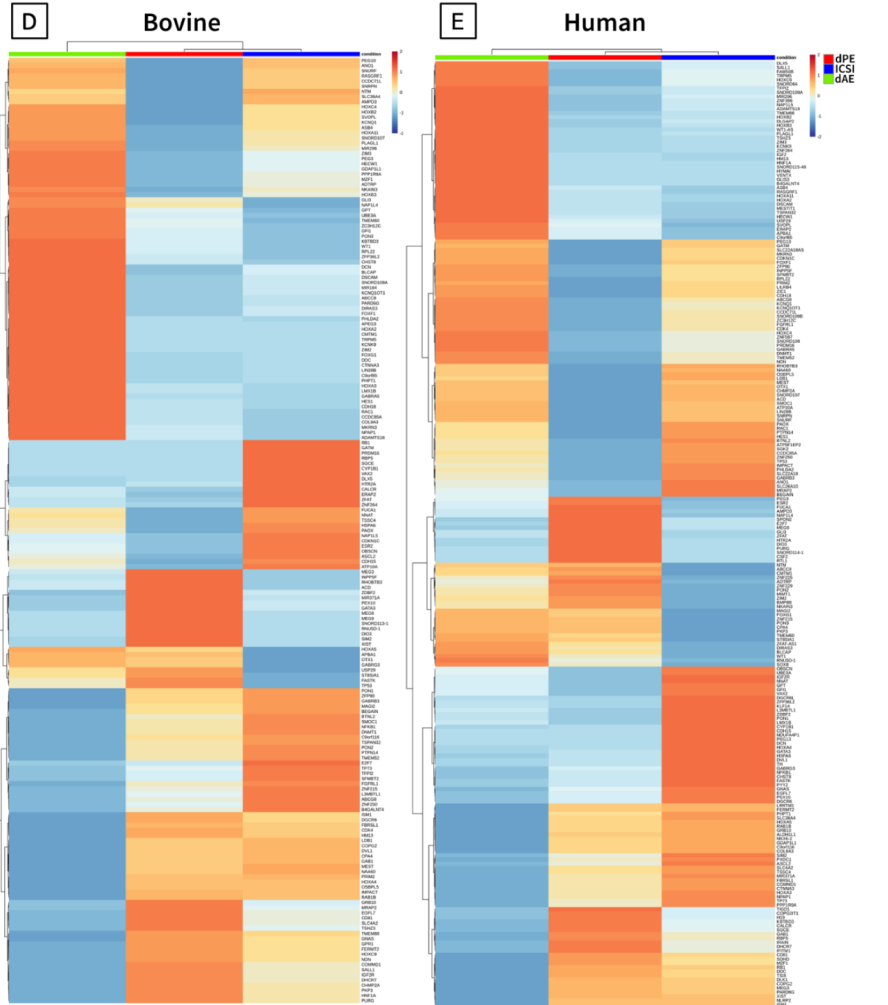

**F-Human dPE vs dAE**

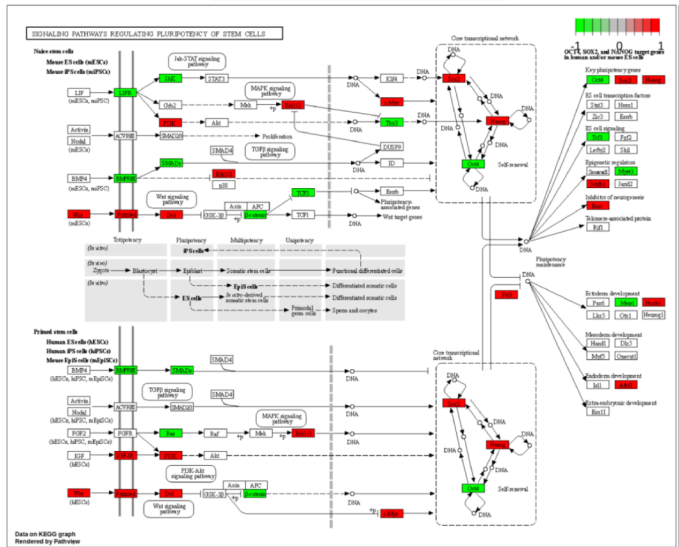

**G-Human ICSI vs dAE**

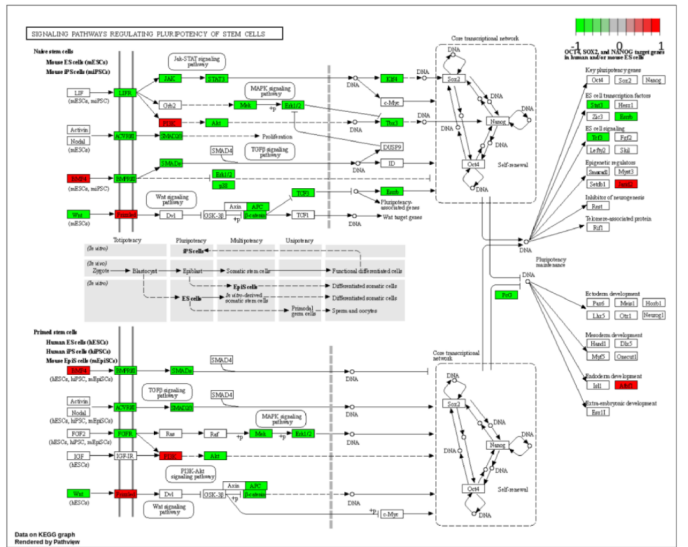

**A****MORULAS DAY 6**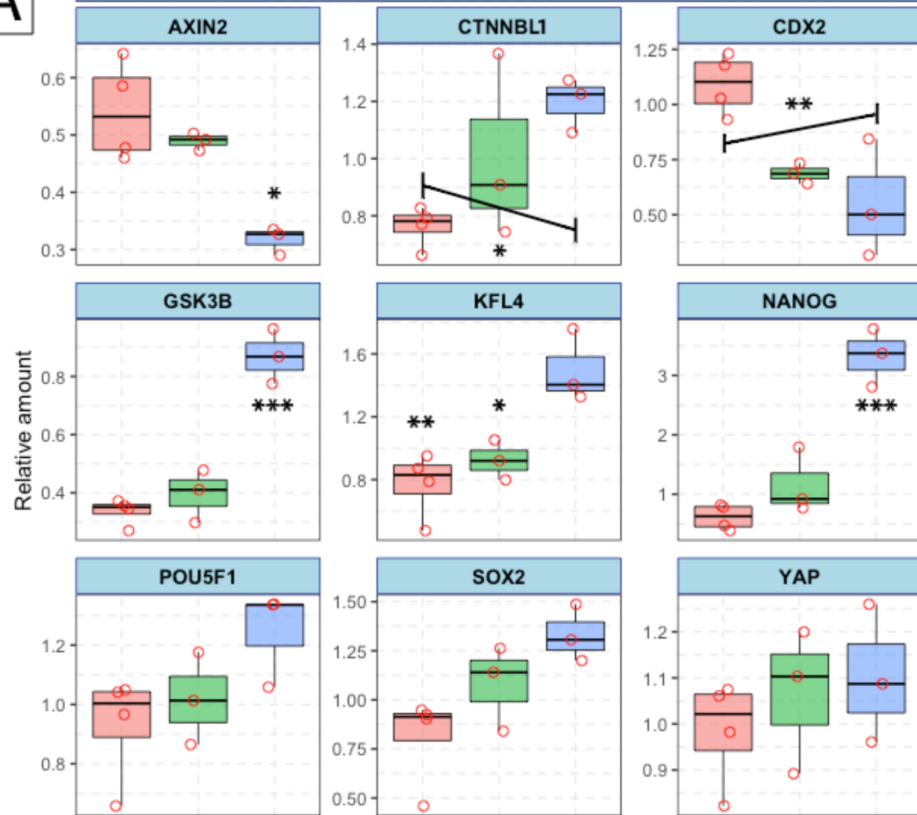**B****MORULAS DAY 7**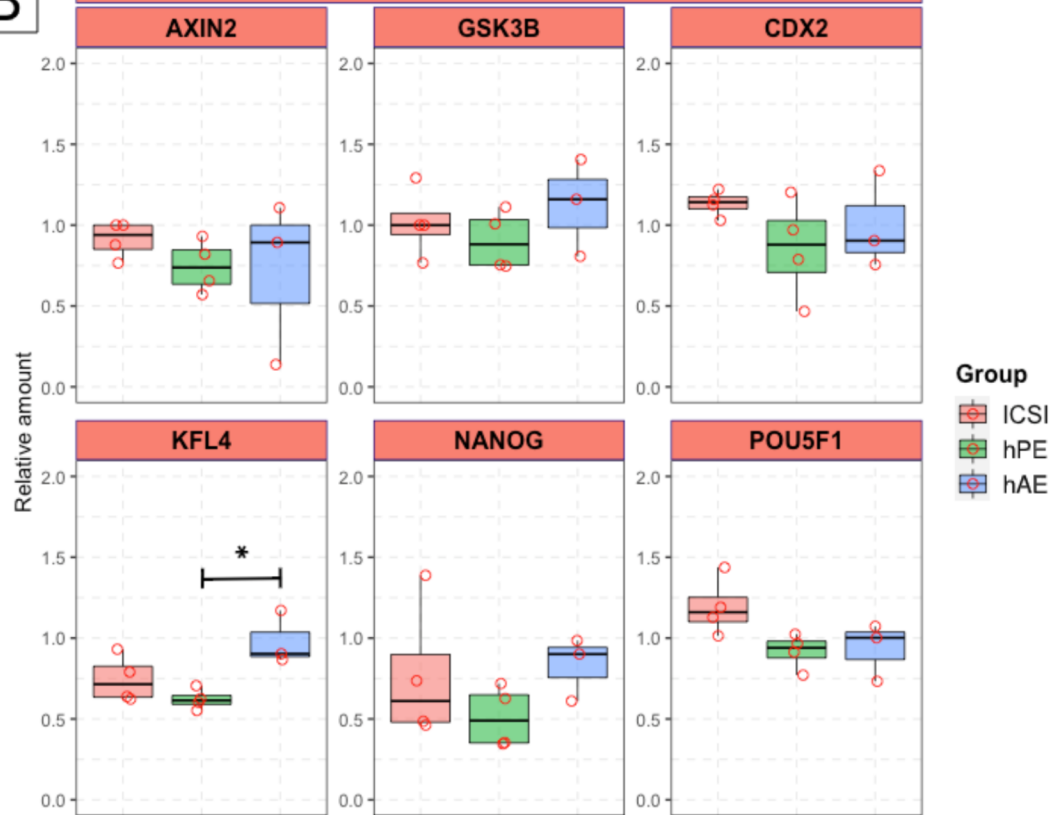**Group**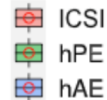

**A**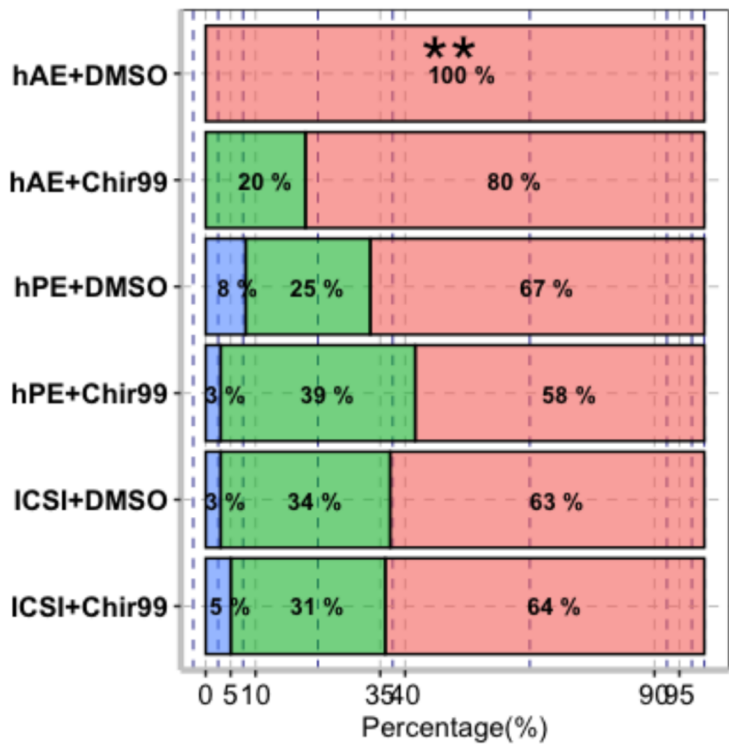

■ Early 
 ■ Expanded 
 ■ Hatched

**B**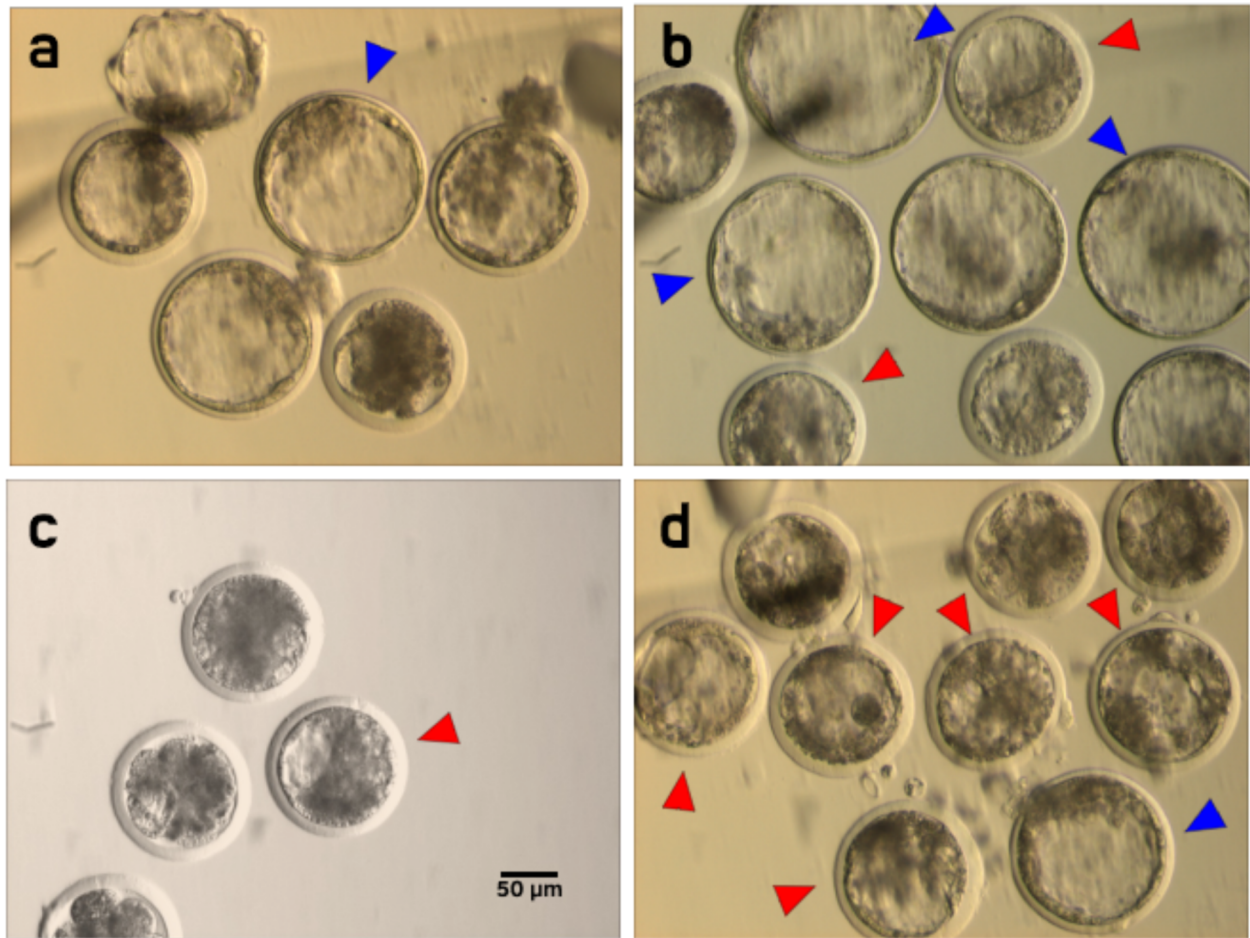



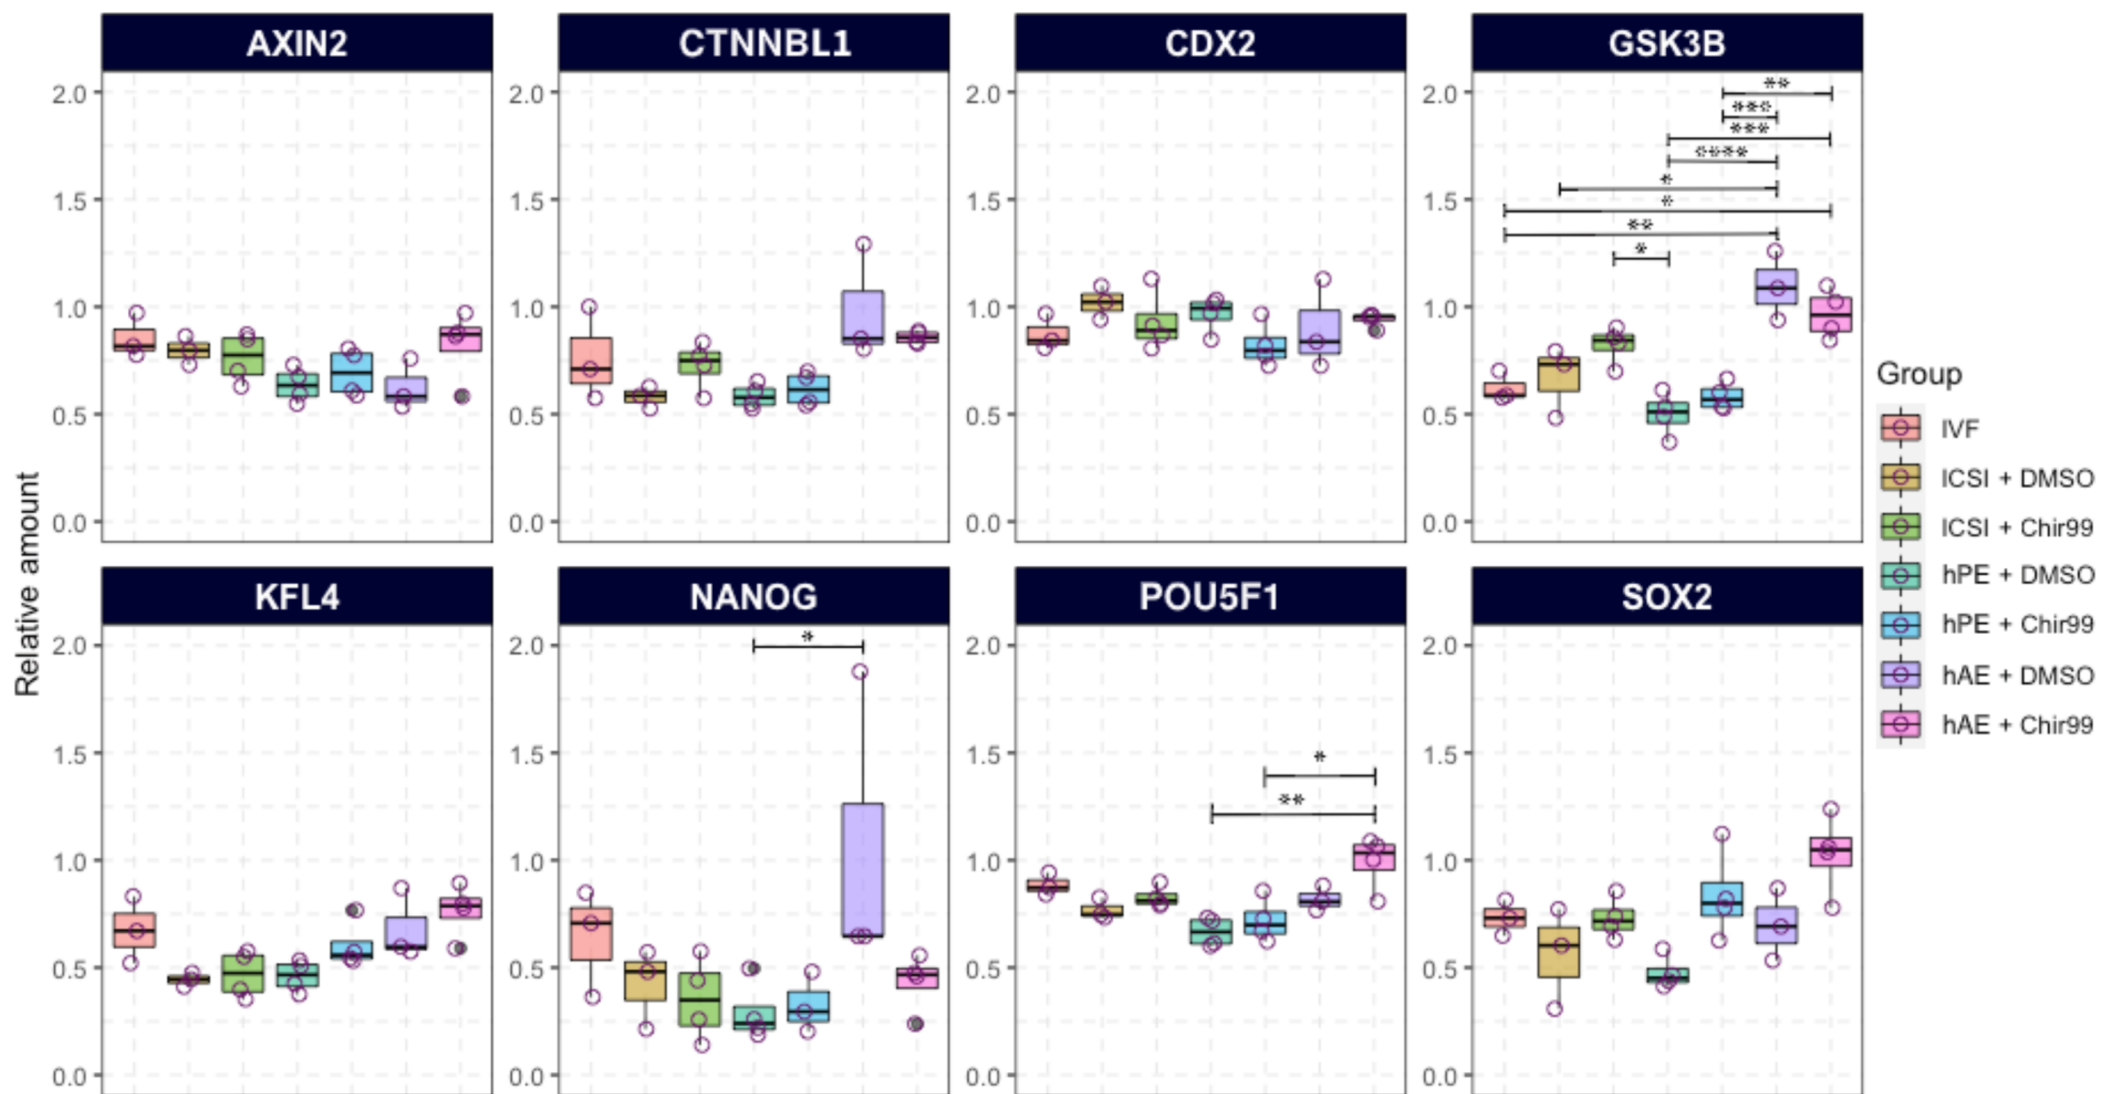



**A**

ICSI hPE hAE + DMSO hAE + Chir99

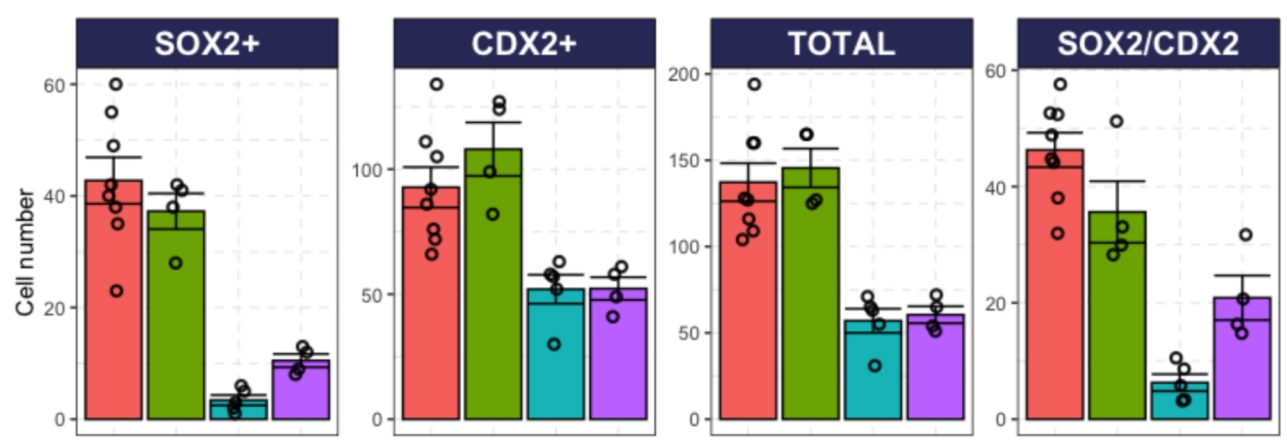

**B**

DNA CDX2+ SOX2+ MERGE

ICSI

hPE

hAE + DMSO

hAE + Chir99

hAE + Chir99 (day 10)

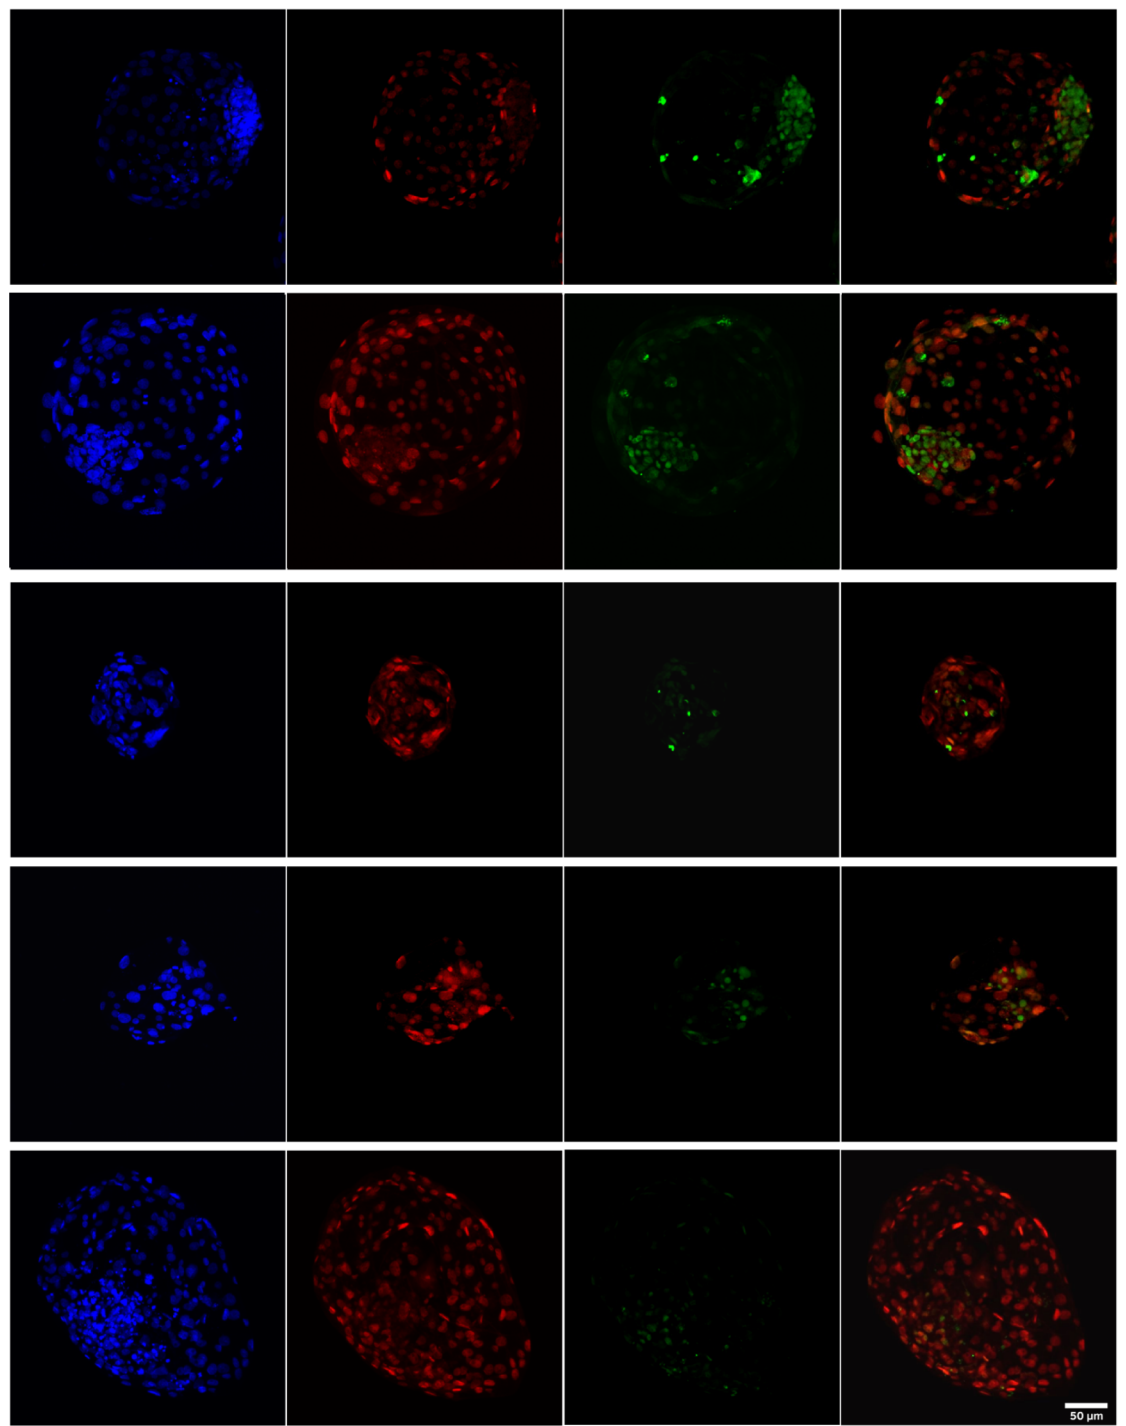

50 μm

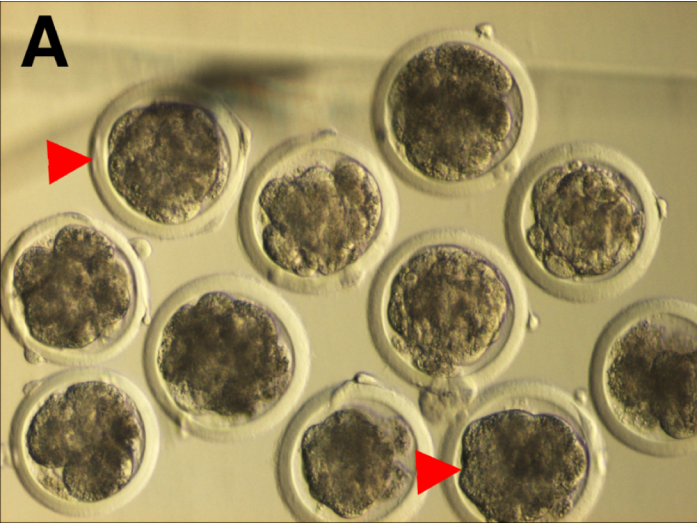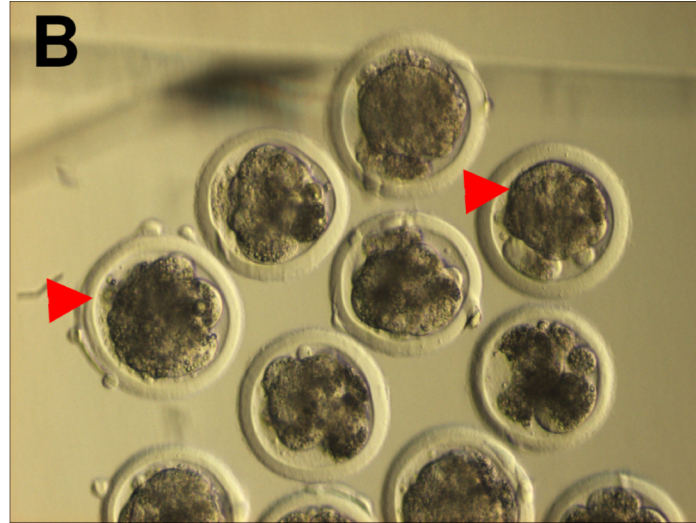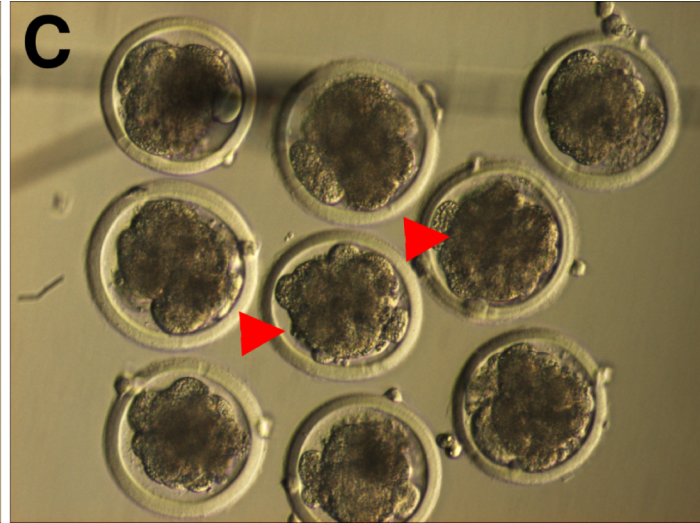

# HKS

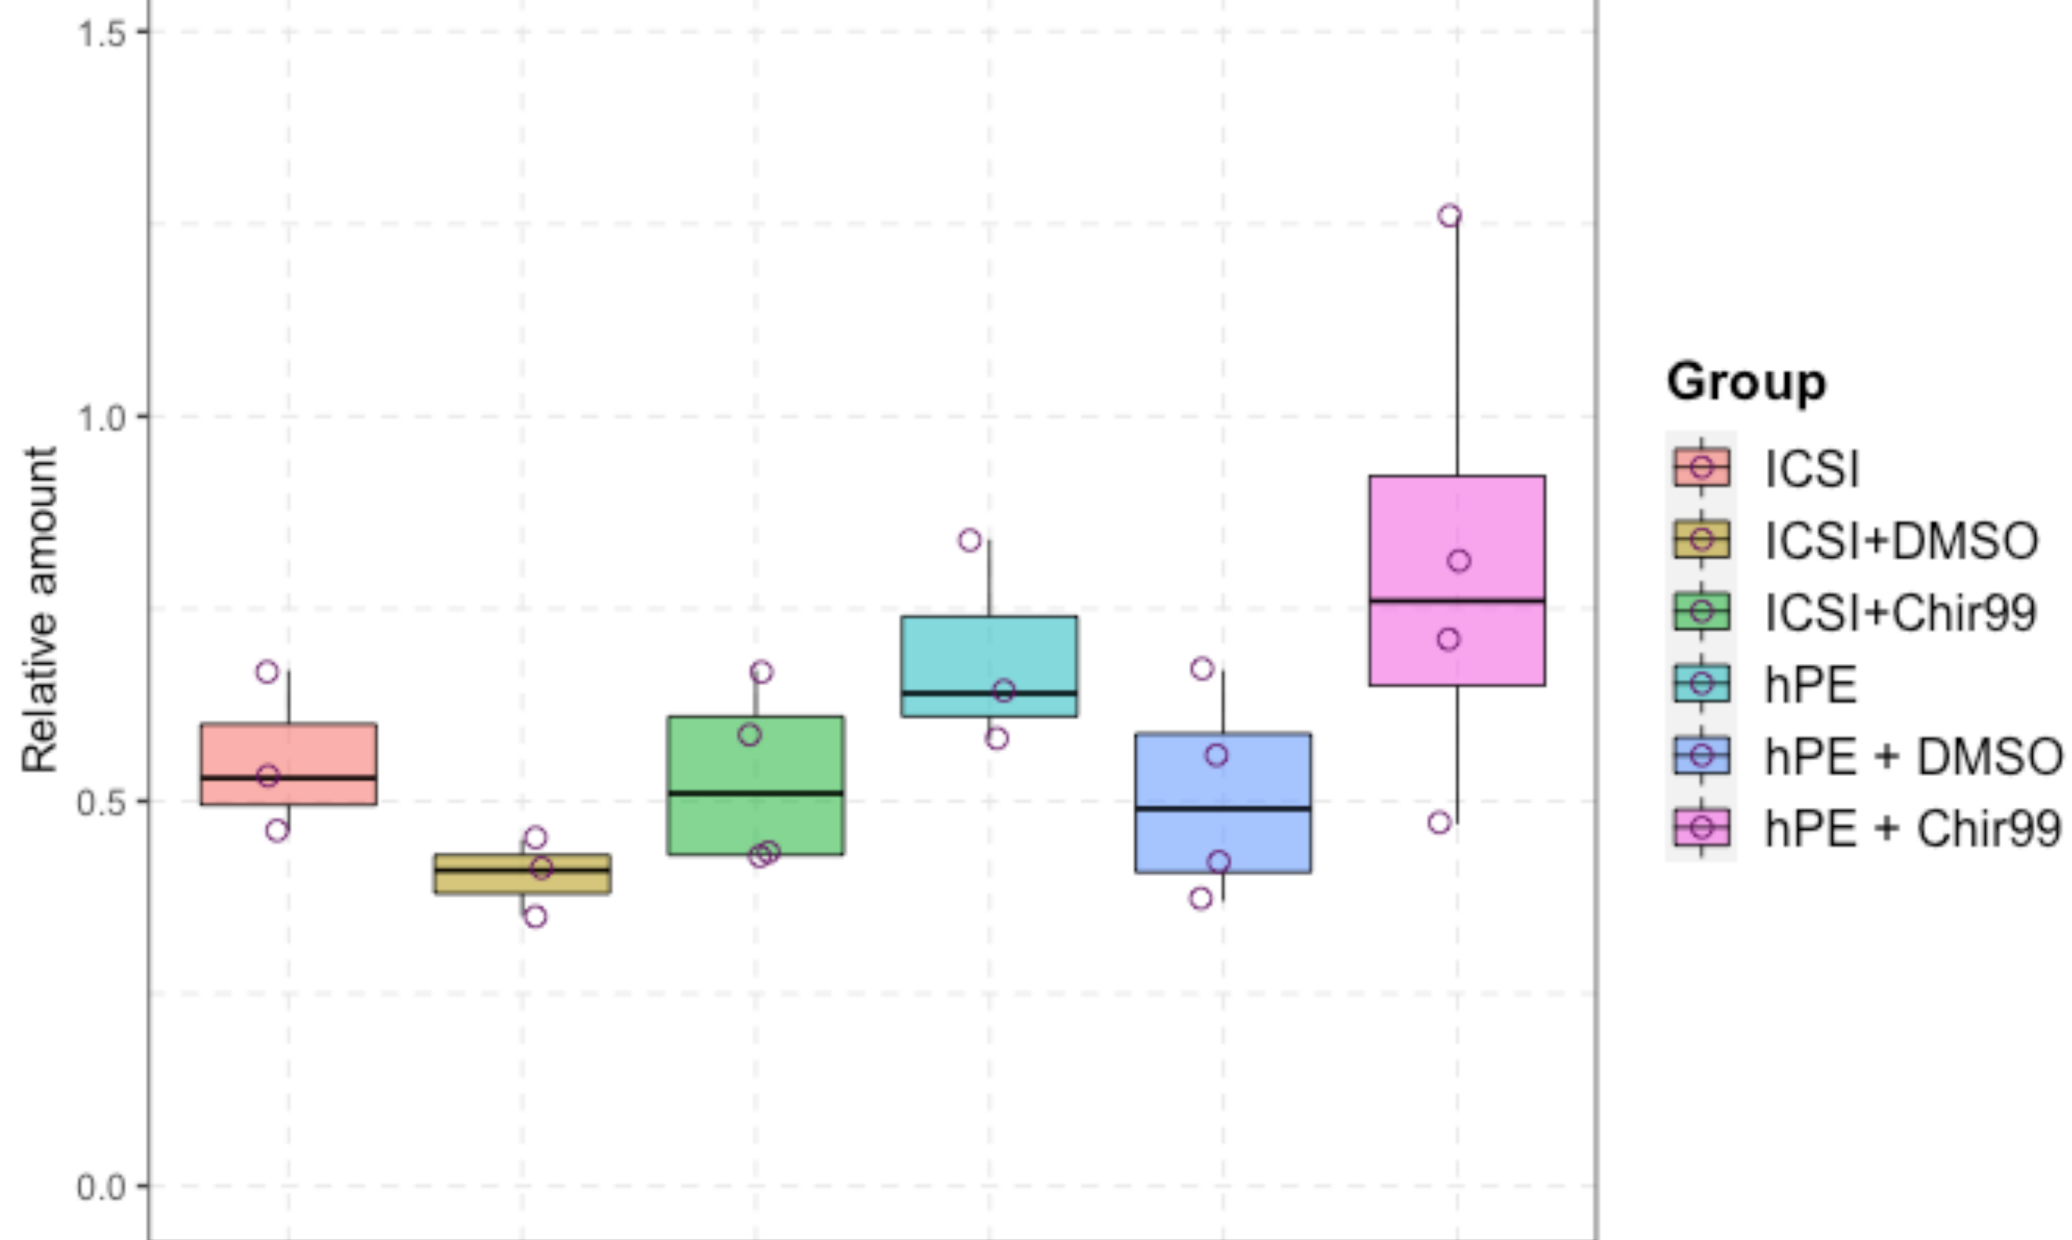

Source: https://www.biorxiv.org/content/10.1101/2023.01.27.525928v1.full.pdf
